## 34 **Abstract**

35 Visually guided behaviors require the brain to transform ambiguous retinal images into object-  
36 level spatial representations and implement sensorimotor transformations. These processes are  
37 supported by the dorsal ‘where’ pathway. However, the specific functional contributions of areas  
38 along this pathway remain elusive due in part to methodological differences across studies. We  
39 previously showed that macaque caudal intraparietal (CIP) area neurons possess robust three-  
40 dimensional (3D) visual representations, carry choice-related and presaccadic activity, and exhibit  
41 experience-dependent sensorimotor associations (Chang et al., 2020b). Here, we used a  
42 common experimental design to reveal parallel processing, hierarchical transformations, and the  
43 formation of sensorimotor associations along the ‘where’ pathway by extending the investigation  
44 to V3A, a major feedforward input to CIP. Higher-level 3D representations and choice-related  
45 activity were more prevalent in CIP than V3A. Both areas contained presaccadic activity that  
46 predicted the direction/timing of eye movements. Intriguingly, the time-course of presaccadic  
47 activity in CIP aligned with the temporally integrated V3A output. Sensorimotor associations  
48 between 3D orientation and saccade direction preferences were strongest in CIP and moderated  
49 by choice signals in both areas. Together, the results explicate parallel representations,  
50 hierarchical transformations, and functional associations of visual and presaccadic signals at a  
51 key juncture in the ‘where’ pathway.

52

## 53 **Introduction**

54 The 3D perceptual and sensorimotor capabilities of primates facilitate their ability to shape the  
55 world. For instance, 3D spatial reasoning is a key predictor of engineering problem solving ability  
56 (Hsi et al., 1997). These capabilities are supported by the dorsal ‘where’ pathway. In particular,  
57 high-level visual transformations are thought to occur in brain areas located at the parieto-occipital  
58 junction (Tsao et al., 2003; Chang et al., 2020b). Parietal cortex is thought to then implement  
59 sensorimotor transformations that map those sensory representations to motor responses (Pause  
60 and Freund, 1989; Rushworth et al., 1997; Buneo and Andersen, 2006). However, assigning  
61 particular functions to specific areas has been challenging due to methodological differences  
62 across studies. Here, we used a common experimental design to investigate two areas that bridge  
63 the parieto-occipital junction in macaque monkeys: intermediate visual area V3A and the caudal  
64 intraparietal (CIP) area.

65 Area CIP is a site of 3D visual processing (Taira et al., 2000; Tsutsui et al., 2002;  
66 Rosenberg et al., 2013; Rosenberg and Angelaki, 2014a,b) which is functionally correlated  
67 (Tsutsui et al., 2003; Elmore et al., 2019) and causally linked (Tsutsui et al., 2001; Van Dromme

68 et al., 2016) to 3D perception. Presaccadic activity and sensorimotor associations in CIP may  
69 further support goal-directed behaviors (Chang et al., 2020b) via connections to oculomotor and  
70 prehensile areas (Lewis and Van Essen, 2000; Premereur et al., 2015; Van Dromme et al., 2016;  
71 Lanzilotto et al., 2019).

72 By comparison, V3A findings have been highly conflicting. Some imply relatively low-level  
73 image processing such as spatiotemporal filtering (Gaska et al., 1987, 1988), basic stereoscopic  
74 depth selectivity (Anzai et al., 2011), and two-dimensional (2D) direction selectivity (Nakhla et al.,  
75 2021). Other findings link V3A to high-level processes underlying stable, allocentric  
76 representations of the world. This includes combining visual and extraretinal signals to represent  
77 objects in non-retinal coordinates (Galletti and Battaglini, 1989; Galletti et al., 1990; Sauvan and  
78 Peterhans, 1999; Nakamura and Colby, 2002), distinguishing veridical object motion from self-  
79 induced retinal image motion (Galletti et al., 1990), and 3D spatial processing (Tsao et al., 2003;  
80 Elmore et al., 2019). Furthermore, V3A activity is modulated by attention and memory-related  
81 factors, and some neurons show postsaccadic activity (Nakamura and Colby, 2000).

82 To directly compare the functional properties of these interconnected areas, we used a  
83 common experimental design to assess: (i) selectivity for the 3D pose (orientation and position)  
84 of planar surfaces, (ii) choice-related activity during a 3D orientation discrimination task (Chang  
85 et al., 2020a), (iii) presaccadic activity during a visually guided saccade task (Munoz and Wurtz,  
86 1995; Hanes and Schall, 1996), and (iv) sensorimotor associations (Chang et al., 2020b). Multiple  
87 lines of evidence converged to support a V3A-to-CIP hierarchy. First, our findings revealed that  
88 robust 3D pose representations are most prominent in CIP, and reconciled conflicting anatomical  
89 evidence of a V3A-to-CIP hierarchy (Baizer et al., 1991; Nakamura et al., 2001) but functional  
90 evidence that 3D orientation is better discriminated from V3A than CIP responses (Elmore et al.,  
91 2019). Second, choice-related activity was associated with robust 3D pose tuning in both areas  
92 but most prevalent in CIP. Third, the areas contained similar proportions of neurons with  
93 presaccadic activity that predicted the direction and timing of eye movements. Presaccadic  
94 activity started earlier in V3A than CIP and the CIP time course closely matched the temporally  
95 integrated V3A output, suggesting that presaccadic signals in CIP may originate in V3A. Notably,  
96 both areas showed sensorimotor associations (which were stronger in CIP than V3A) that were  
97 statistically moderated by choice-related activity. Together, these findings challenge classical  
98 notions of sensorimotor dichotomies, argue for a reclassification of V3A as association cortex,  
99 and implicate choice-related activity as a novel factor in sensorimotor processing.

## 100 Results

101 To investigate the contributions of V3A and CIP to the transformation of retinal images into object-  
102 level representations and goal-directed sensorimotor processing, we compared the 3D selectivity,  
103 presaccadic properties, and sensorimotor associations of 692 V3A neurons (Monkey L: N = 311;  
104 Monkey F: N = 263; Monkey W: N = 118) and 437 previously analyzed CIP neurons (Monkey L:  
105 N = 218; Monkey F: N = 219) (Chang et al., 2020b). The areas were dissociated from each other  
106 and adjacent regions using multiple anatomical and functional criteria (**Figure 1; Materials and**  
107 **methods**). Supporting a V3A-to-CIP hierarchy, the median visual response latency was shorter  
108 in V3A (46 ms) than CIP (52 ms) and the receptive fields were smaller in V3A than CIP (**Figure**  
109 **1—figure supplement 1**).

110

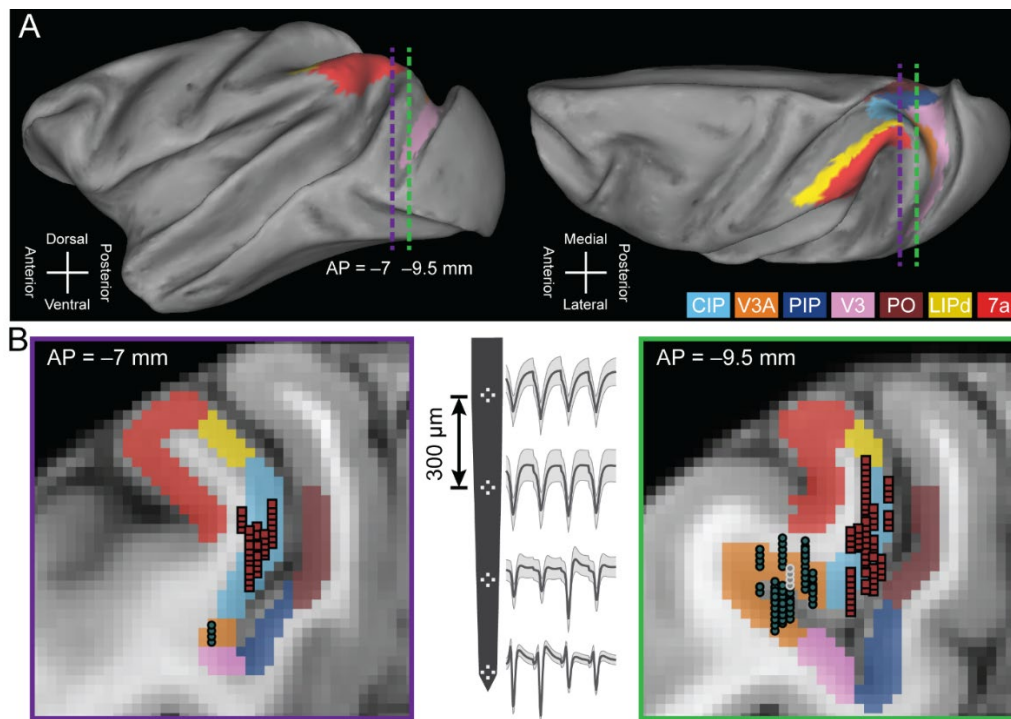

111

112 **Figure 1.** Neuronal recordings. (A) Lateral (left) and dorsal (right) views of the inflated cortical  
113 surface of Monkey L (left hemisphere). Dashed lines mark the coronal sections in B. (B) Coronal  
114 sections (left: AP = -7 mm; right: AP = -9.5 mm) with MRI-based estimates of the boundaries of  
115 V3A, CIP, and adjacent areas. Recording locations for V3A (blue-gray circles) and CIP (red  
116 squares) were projected along the AP axis onto the closest of the two coronal sections shown. A  
117 schematic of a four-tetrode laminar probe with spike waveforms from the V3A recording marked  
118 with white circles in the right coronal section are shown (middle). Abbreviations: CIP, caudal  
119 intraparietal area (light blue); V3A, visual area V3A (orange); PIP, posterior intraparietal area; V3,  
120 visual area V3; PO, parieto-occipital area; LIPd, dorsal aspect of the lateral intraparietal area; and  
121 area 7a.

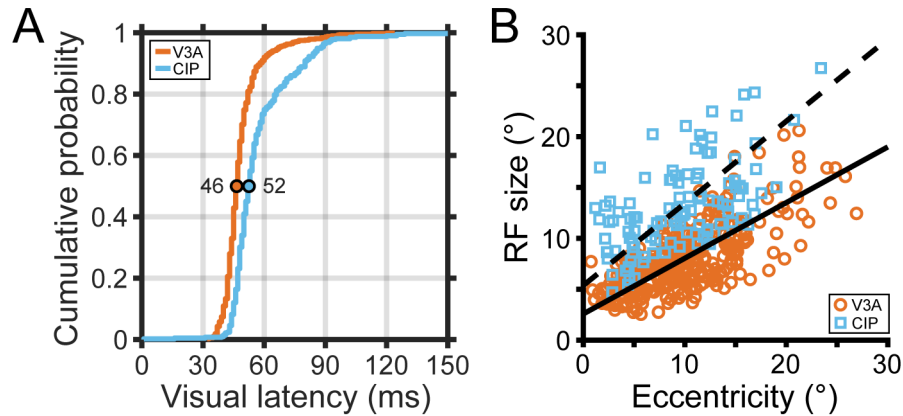

122

123 **Figure 1—figure supplement 1.** Response latencies and receptive field sizes. **(A)** Cumulative  
124 density functions for the visual latencies of V3A (orange) and CIP (blue) neurons. Colored circles  
125 mark the median latencies. **(B)** Receptive field (RF) size versus eccentricity for V3A (orange  
126 circles) and CIP (blue squares). RF size was defined as the square root of the RF area. Type II  
127 regression lines are shown for V3A (solid line; RF size =  $2.6 + 0.55 \times \text{eccentricity}$ ) and CIP (dashed  
128 line; RF size =  $5.4 + 0.81 \times \text{eccentricity}$ ).

129

### 130 Behavioral discrimination of 3D surface orientation

131 To investigate the transformation of visual representations into goal-directed behaviors, we  
132 trained three monkeys to report the 3D orientation of a planar surface (Chang et al., 2020a).  
133 Specifically, they performed an eight-alternative forced choice (8AFC) tilt discrimination task with  
134 planar surfaces presented at different orientations and distances (**Figure 2**). The orientation was  
135 defined by two angular variables (Stevens, 1983; Rosenberg et al., 2013): tilt and slant. Tilt  
136 describes which side of the plane was nearest to the monkey and slant describes the rotation in  
137 depth (**Figure 2A**). Planes were presented for 1 s while fixation was maintained on a target at the  
138 center of the screen. The monkey then reported the plane's tilt (the near side) via a saccade to  
139 the corresponding choice target, regardless of the slant or distance (**Figure 2B**).

140 Behavioral performance was quantified each session by calculating the distribution of  
141 reported tilt errors ( $\Delta\text{Tilt} = \text{reported tilt} - \text{presented tilt}$ ) for each stimulus condition with non-zero  
142 slant (128 tilt x slant x distance conditions). Each error distribution was fit with a von Mises  
143 probability density function. Behavioral sensitivity was quantified as the concentration parameter  
144 ( $\kappa$ ) of the von Mises fit (Chang et al., 2020a). The performance during the CIP recording sessions  
145 was previously reported (Chang et al., 2020b), so here we report on the V3A sessions only  
146 (Monkey L: N = 39; Monkey F: N = 38; Monkey W: N = 14). Consistent with previous results, the  
147 sensitivity of all three animals significantly depended on distance (ANOVA; all  $p \leq 4.5 \times 10^{-27}$ ) and  
148 slant (all  $p \leq 1.8 \times 10^{-7}$ ), but not tilt (linearized into cosine, all  $p \geq 0.03$ , and sine, all  $p \geq 0.05$ ,  
149 components; none significant at  $p < 0.05$  after Bonferroni-Holm correction for 3 monkeys) (Fisher,

150 1995). We therefore recalculated the sensitivity as a function of distance and slant only (16  
 151 conditions after pooling across tilt). As previously found, sensitivity decreased with distance from  
 152 fixation and increased with slant (**Figure 2C**). To relate this pattern of behavioral sensitivity to  
 153 V3A and CIP activity, we next characterized the simultaneously recorded neuronal responses.

154

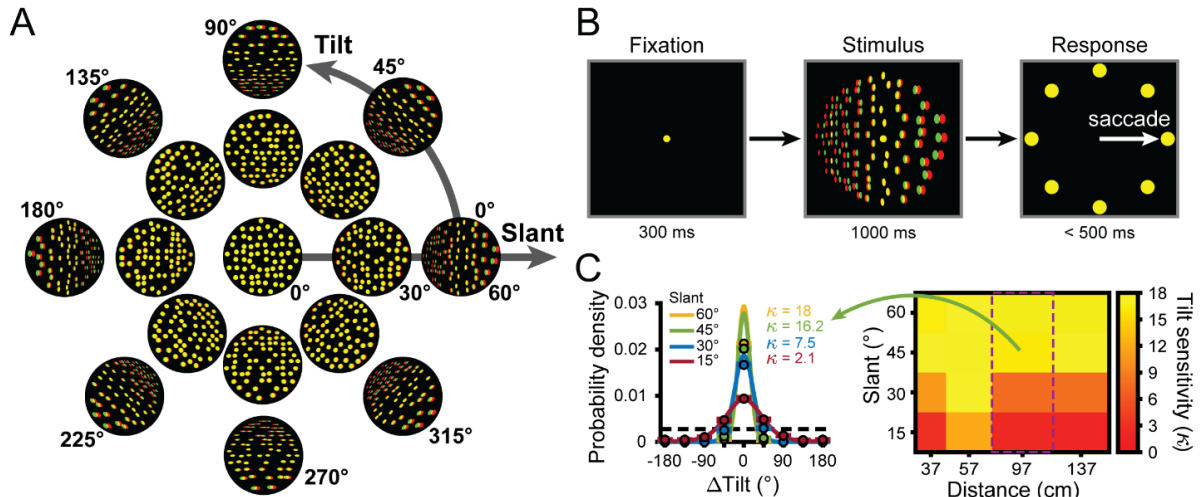

155

156 **Figure 2.** Stimuli, task, and behavioral performance. **(A)** Planar surfaces were defined using  
 157 random dots with perspective and stereoscopic cues (illustrated here as red-green anaglyphs).  
 158 For clarity, the size and number of dots differ from the actual stimuli. **(B)** Eight-alternative tilt  
 159 discrimination task. A trial began by fixating a dot at the center of the screen (fixation was always  
 160 at screen distance, 57 cm) for 300 ms (left). A plane was then presented with a given tilt (0° to  
 161 315°, 45° steps), slant (0° to 60°, 15° steps), and distance (37, 57, 97, and 137 cm) for 1 s  
 162 (middle). The fixation target and plane then disappeared and eight choice targets corresponding  
 163 to the eight tilts appeared (right). This cued the monkey to saccade to one of the targets to report  
 164 which side of the plane was nearest. **(C)** Behavioral performance. Error distributions of reported  
 165 tilts for each slant at 97 cm for Monkey W (left). Data points show the mean probability of a given  
 166  $\Delta\text{Tilt}$  (reported tilt – presented tilt) and error bars show standard error of the mean (SEM) across  
 167 sessions (N = 14). Solid curves are von Mises probability density functions with sensitivities ( $\kappa$ )  
 168 indicated. The black dashed line marks chance level. The heat map (right) shows the mean tilt  
 169 sensitivity for each slant (rows) and distance (columns) for Monkey W across sessions. Yellow  
 170 hues indicate higher sensitivities. Green arrow and purple rectangle mark the data shown in the  
 171 error distribution plots (left).

172

### 173 Hierarchical transformations in the representation of 3D orientation

174 The visual system is thought to turn ambiguous 2D retinal signals into behaviorally relevant 3D  
 175 object representations through a series of transformations. We therefore hypothesized that CIP  
 176 would contain a higher-level representation of 3D pose than V3A. For a 3D pose selective neuron,  
 177 the shape of its 3D orientation tuning curve will be tolerant to distance, but its overall response  
 178 amplitude (gain) should be distance-dependent (Janssen et al., 2000; Nguyenkim and DeAngelis,  
 179 2003; Alizadeh et al., 2018; Chang et al., 2020b). In contrast, a neuron selective for lower-level  
 180 visual features (e.g., binocular disparity) will have 3D orientation tuning curves whose shape and



181 gain are highly distance-dependent. To test for 3D pose tuning, we therefore assessed how 3D  
 182 orientation tuning depended on distance.

183 The 3D orientation tuning curves of four representative V3A neurons are shown in **Figure**  
 184 **3A-D** (qualitatively similar examples from CIP are shown in Figure 3 of Chang et al., 2020b).  
 185 Some neurons had similar 3D orientation tuning across all (**Figure 3A**) or most (**Figure 3B**)  
 186 distances with distance-dependent gain changes, implying 3D pose tuning. Others had significant  
 187 orientation tuning at a single distance (ANOVA,  $p < 0.05$ ; Bonferroni-Holm corrected for 4  
 188 distances; **Figure 3C**), which may reflect intermediate selectivity for gradients of absolute  
 189 binocular disparity (Nguyenkim and DeAngelis, 2003). The orientation tuning of other neurons  
 190 changed substantially with distance (**Figure 3D**), implying lower-level visual feature selectivity.  
 191 These examples suggest that V3A contains a heterogeneous population of neurons whose  
 192 functional properties range from processing low-level visual features to 3D object pose.

193

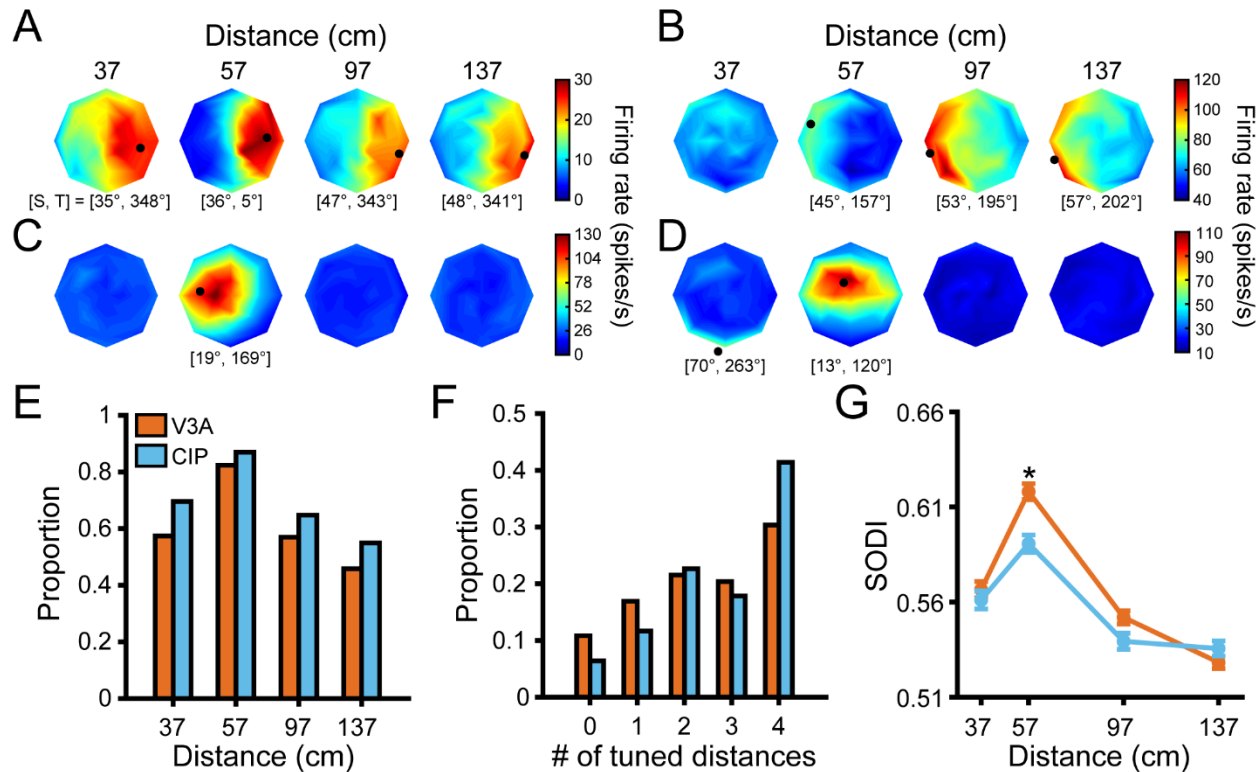

194

195 **Figure 3.** Comparison of 3D orientation tuning across distance. (**A-D**) Four example V3A neurons.  
 196 Heat maps show firing rate plotted as a function of tilt (angular axis) and slant (radial axis). Red  
 197 hues indicate higher firing rates. Black dots mark preferred 3D orientations from Bingham function  
 198 fits at distances with significant tuning (ANOVA,  $p < 0.05$ ; Bonferroni-Holm corrected for 4  
 199 distances). Some dots are not located on a disc because the largest tested slant was  $60^\circ$  but slant  
 200 ranges from  $0^\circ$  to  $90^\circ$ . The preferred slant (S) and tilt (T) are indicated for each tuned distance.  
 201 (**E**) Proportion of neurons with significant orientation tuning at each distance for V3A (orange;  
 202 proportions: 37 cm = 0.57, 57 cm = 0.82, 97 cm = 0.57, 137 cm = 0.46) and CIP (blue; proportions:

203 37 cm = 0.70, 57 cm = 0.87, 97 cm = 0.65, 137 cm = 0.55). **(F)** Proportion of neurons with  
204 significant orientation tuning at each possible number of distances for V3A (proportions: #0 =  
205 0.11, #1 = 0.17, #2 = 0.22, #3 = 0.20, #4 = 0.30) and CIP (proportions: #0 = 0.06, #1 = 0.12, #2 =  
206 0.23, #3 = 0.18, #4 = 0.41). **(G)** Comparison of SODI values at each distance for V3A (orange)  
207 and CIP (blue). Data points and error bars are mean and SEM across neurons with significant  
208 orientation tuning, respectively. The asterisk indicates a significant difference between V3A and  
209 CIP SODI values at 57 cm only (ANOVA followed by Tukey's HSD test,  $p < 0.05$ ).  
210

211 In both areas, more neurons had 3D orientation tuning at 57 cm (fixation distance) than at  
212 the other distances (**Figure 3E**). Although the proportion of neurons with significant tuning at each  
213 distance was greater in CIP than V3A, the cross-area difference was not significant (Chi-squared  
214 Test,  $\chi^2 = 2.4$ ,  $p = 0.50$ ). However, CIP neurons were typically tuned for 3D orientation at more  
215 distances than V3A neurons (Chi-squared Test,  $\chi^2 = 21.2$ ,  $p = 2.9 \times 10^{-4}$ ; **Figure 3F**), implying  
216 greater convergence of orientation information across distance within CIP than V3A.

217 We next examined the 3D orientation preferences and tuning curve shapes by fitting each  
218 significant orientation tuning curve (ANOVA,  $p < 0.05$ ; Bonferroni-Holm corrected for 4 distances)  
219 with a Bingham function (Bingham, 1974). The Bingham function is a low-dimensional, parametric  
220 model over tilt and slant which describes V3A and CIP 3D orientation tuning curves (Rosenberg  
221 et al., 2013; Rosenberg and Angelaki, 2014a; Elmore et al., 2019; Chang et al., 2020b). The  
222 preferred orientation taken from these fits is marked with a black dot for the example neurons in  
223 **Figure 3A-D**. In both V3A and CIP, the full span of 3D orientations was represented at each  
224 distance (**Figure 3—figure supplement 1**), indicating that both areas can support neural codes  
225 for 3D pose. To compare the shape of the orientation tuning curves, we used the Bingham  
226 parameters describing the bandwidth ( $\lambda_2$ ), isotropy ( $\lambda_1$ ), and axis about which any anisotropy  
227 occurred ( $\Phi$ ). First, there was a slight but significant tendency for V3A neurons (median  $\lambda_2 = 0.80$ )  
228 to be more narrowly tuned than CIP neurons (median  $\lambda_2 = 0.65$ ; linear mixed-effects model with  
229 area and absolute distance from fixation as fixed effects and neuron as a random effect,  $p =$   
230  $6.9 \times 10^{-4}$ ; **Figure 3—figure supplement 2A,B**). This difference may reflect convergent input from  
231 multiple V3A neurons onto individual CIP neurons. The tuning bandwidths also increased with  
232 distance from fixation ( $p = 5.9 \times 10^{-6}$ ), implying information loss that mirrored the behavioral finding  
233 that tilt discrimination performance decreased with distance from fixation (Chang et al., 2020a,b)  
234 (**Figure 2C**, see Figure 5). Second, the V3A tuning curves were less isotropic (more elongated;  
235 median  $\lambda_1 = -1.62$ ) than the CIP tuning curves (median  $\lambda_1 = -0.92$ ), and the difference was  
236 significant ( $p = 4.2 \times 10^{-10}$ ; **Figure 3—figure supplement 2C,D**). The level of anisotropy also  
237 significantly increased with distance from fixation ( $p = 1.0 \times 10^{-5}$ ). Lastly, the distributions of  $\Phi$   
238 peaked at approximately  $90^\circ$  in both V3A (median  $\Phi = 88^\circ$ ) and CIP (median  $\Phi = 89^\circ$ ), indicating



239 that any anisotropy in the tuning curves generally occurred along the tilt/slant axes (**Figure**  
 240 **3—figure supplement 2E,F**). These findings indicate greater orientation tuning symmetry in CIP  
 241 than V3A, which may be important for perceptual sensitivity to changes in object orientation to  
 242 not depend on the axis of rotation (Chang et al., 2020b).

243

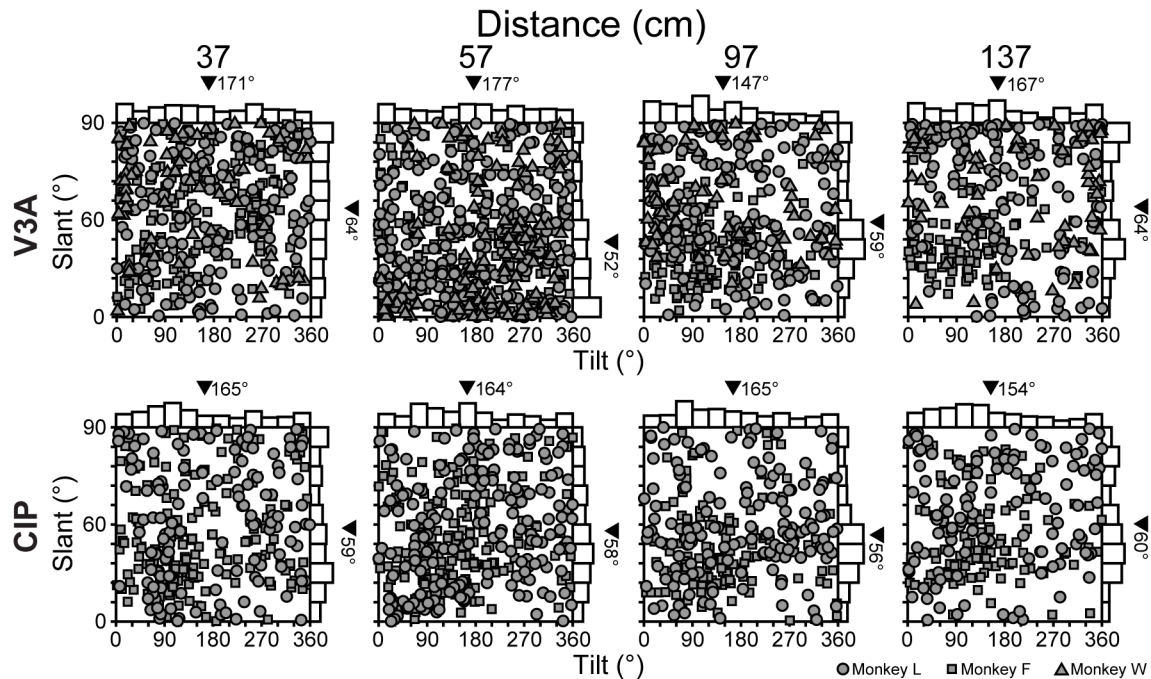

244

245 **Figure 3—figure supplement 1.** Distributions of 3D orientation preferences. Tilt and slant  
 246 preferences in V3A (top row; 37 cm: N = 397 neurons; 57 cm: N = 570; 97 cm: N = 394; 137 cm:  
 247 N = 317) and CIP (bottom row; 37 cm: N = 304; 57 cm: N = 380; 97 cm: N = 283; 137 cm: N =  
 248 240) plotted using an equal area projection (Rosenberg et al., 2013). Marginal histograms show  
 249 the distributions of tilt and slant. Black triangles mark mean values.

250

251 One potential challenge to the hypothesized V3A-to-CIP hierarchy is a report that 3D  
 252 orientation could be better discriminated from V3A than CIP responses (Elmore et al., 2019). To  
 253 follow-up on that finding, we computed a surface orientation discrimination index (SODI) that  
 254 quantifies the difference in responses to preferred and non-preferred orientations relative to the  
 255 response variability (**Equation 2**). For each neuron, we calculated the SODI at each distance with  
 256 significant orientation tuning. In both areas, the mean SODI had an inverted U-shape as a function  
 257 of distance that peaked at 57 cm (fixation distance; **Figure 3G**). This indicates that 3D orientation  
 258 was most discriminable at the fixation distance, which may be a downstream consequence of V1  
 259 neurons tending to prefer smaller binocular disparities (Prince et al., 2002). Consistent with the  
 260 Elmore et al. (2019) finding, the SODI values were significantly larger in V3A than CIP, but only  
 261 at the fixation distance (ANOVA followed by Tukey's HSD test,  $p = 1.1 \times 10^{-5}$ ; all other distances  $p$   
 262  $\geq 0.47$ ) which was the only distance tested in the Elmore study. This cross-area difference may

263 appear to challenge the hypothesized hierarchy, but as we consider next, may alternatively reflect  
 264 a transformation from lower-level visual feature selectivity to higher-level 3D pose tuning.  
 265

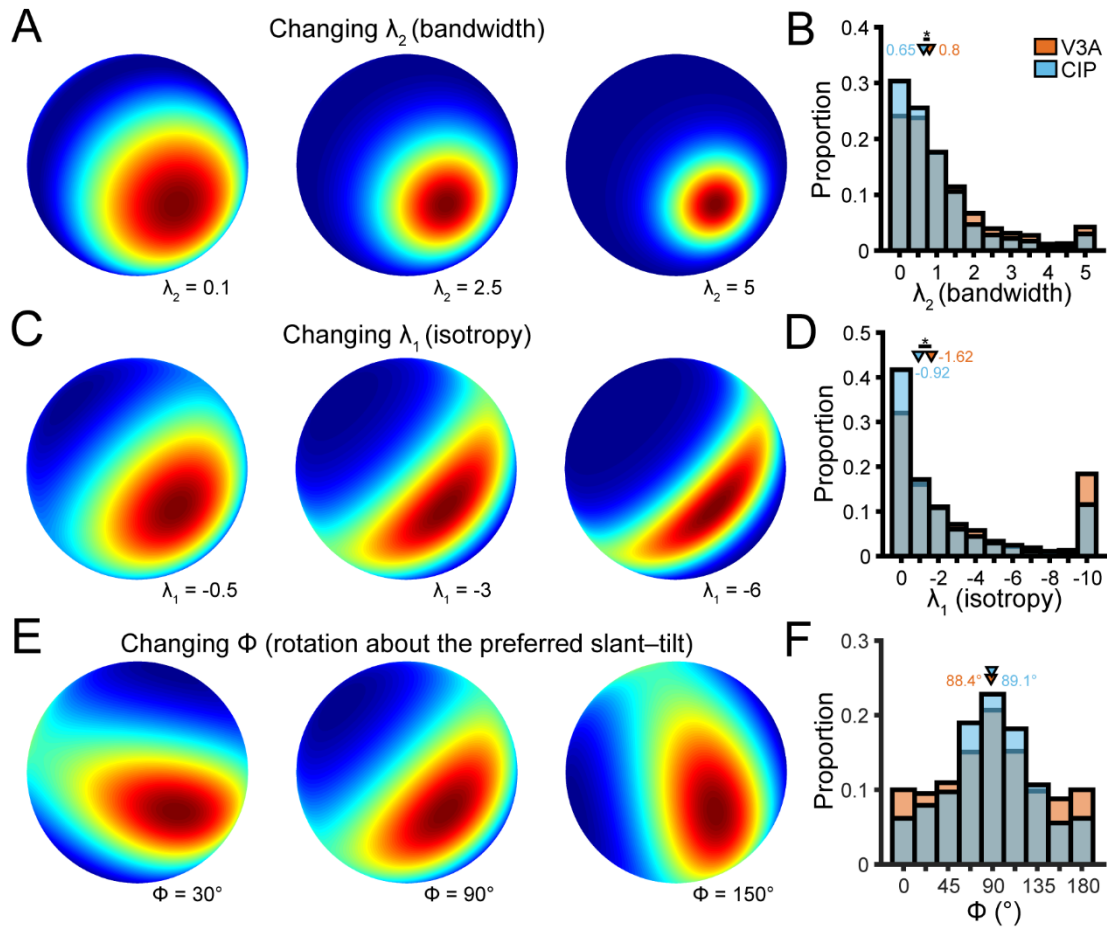

266

267 **Figure 3—figure supplement 2.** Cross-area comparison of 3D orientation tuning curve shape.  
 268 Three Bingham function parameters set the bandwidth ( $\lambda_2$ ), isotropy ( $\lambda_1$ ), and axis about which  
 269 tuning anisotropy occurred ( $\Phi$ ). **(A)** Bandwidth ( $\lambda_2 \geq 0$ ). Larger values indicate narrower tuning.  
 270 Fixed parameters in the schematic:  $\lambda_1 = 0$ ,  $\Phi =$  undefined since  $\lambda_1 = 0$ . **(B)** Distribution of  $\lambda_2$  in V3A  
 271 (orange bars) and CIP (blue bars). **(C)** Isotropy ( $\lambda_1 \leq 0$ ). More negative values indicate greater  
 272 anisotropy. Fixed parameters in the schematic:  $\lambda_2 = 0.7$  and  $\Phi = 90^\circ$ . **(D)** Distributions of  $\lambda_1$ . **(E)**  
 273 Axis about which tuning anisotropy occurred ( $0^\circ \leq \Phi < 180^\circ$ ). Fixed parameters within the  
 274 schematic:  $\lambda_2 = 0.7$  and  $\lambda_1 = -1.5$ . **(F)** Distributions of  $\Phi$ . Bars at  $0^\circ$  and  $180^\circ$  are identical.  
 275 Distributions in **C, E, G** include all distances (V3A:  $N = 1,799$ ; CIP:  $N = 1,276$ ) and triangles mark  
 276 median values. Asterisks in **B, D** mark significant cross-area differences (linear mixed-effects  
 277 model with area and absolute distance from fixation as fixed effects and neuron as a random  
 278 effect;  $p < 0.05$  for main effect of area).  
 279

## 280 Hierarchical refinement of 3D pose representations

281 We next wanted to evaluate cross-area differences in lower-level visual feature selectivity versus  
 282 higher-level 3D pose tuning. To distinguish these representations, we assessed how the shape  
 283 of the 3D orientation tuning curves depended on distance (Janssen et al., 2000; Nguyenkim and

284 DeAngelis, 2003; Alizadeh et al., 2018). This approach recently revealed 3D pose tuning in CIP  
285 (Chang et al., 2020b) but has not been applied to V3A. It thus remains unknown if 3D pose tuning  
286 in CIP is simply inherited or reflects a qualitative transformation of feedforward input.

287 To quantify the distance-dependence of 3D orientation tuning curve shape, we fit each  
288 3D pose tuning curve with a separable model (**Equation 3**) and computed a Tolerance index  
289 (Chang et al., 2020b). Tolerance values near zero indicate that the shape of the orientation tuning  
290 curve changed substantially with distance (as expected for neurons selective for low-level visual  
291 features). Values near one indicate that the shape changed minimally with distance (implying 3D  
292 pose tuning). As shown for the example neurons, larger Tolerance values were associated with  
293 3D pose tuning (Tolerance = 0.96, 0.74; **Figure 3A,B**, respectively), modest values with more  
294 intermediate representations (Tolerance = 0.41; **Figure 3C**), and low values with low-level feature  
295 selectivity (Tolerance = 0.17; **Figure 3D**). Across the V3A population, the Tolerance values  
296 revealed a heterogeneous population in which neurons ranged from having low-level visual  
297 feature selectivity to high-level 3D pose tuning (**Figure 4A**, orange bars).

298

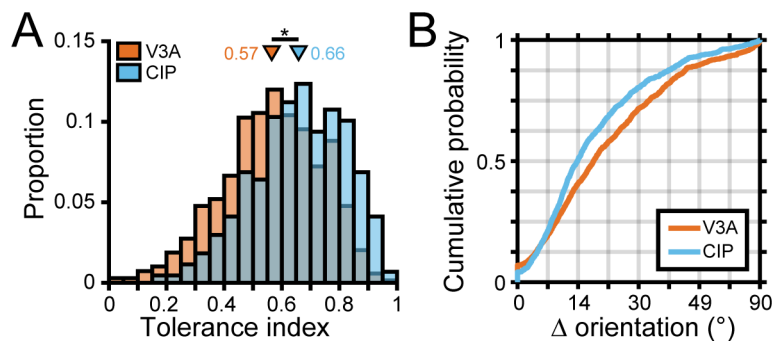

299

300 **Figure 4.** Robust 3D pose tuning was less prevalent in V3A than CIP. **(A)** Distribution of Tolerance  
301 values in V3A (orange; N = 692) and CIP (blue; N = 437). Triangles mark mean Tolerance values  
302 and the asterisk indicates a statistically significant difference (two-sample t-test,  $p < 0.05$ ). **(B)**  
303 Cumulative density functions over the angular deviations between the orientation preference at  
304 each distance and the principal orientation for each neuron.

305

306 To test our hypothesis that 3D pose tuning would be more prevalent in CIP than V3A, we  
307 first compared the Tolerance distributions. Across the populations, the mean Tolerance was  $0.57$   
308  $\pm 6.7 \times 10^{-3}$  SEM in V3A (**Figure 4A**, orange bars; N = 692) and  $0.66 \pm 7.7 \times 10^{-3}$  SEM in CIP (**Figure**  
309 **4A**, blue bars; N = 437). As predicted, the Tolerance values in CIP were significantly larger than  
310 in V3A (two-sample t-test,  $p = 7.4 \times 10^{-19}$ ), indicating that the shape of 3D orientation tuning curves  
311 was more similar across distance in CIP than V3A. We also quantified the extent to which the  
312 orientation preferences of individual neurons differed across distance. For each neuron, we  
313 calculated the angular deviation between the preferred orientation at each distance and its

314 principal orientation (Chang et al., 2020b) (**Materials and Methods**). We then computed  
315 cumulative density functions over the angular deviations and found that the deviation was  
316 significantly greater in V3A than CIP (Kolmogorov-Smirnov test,  $p = 1.2 \times 10^{-9}$ ; **Figure 4B**). Thus,  
317 although both areas represented the full span of 3D orientations at each distance (**Figure**  
318 **3—figure supplement 1**), the orientation preferences of individual neurons were more similar  
319 across distance in CIP than V3A. These results support that a transformation from lower-level  
320 visual features to higher-level 3D object representations occurs between V3A and CIP.

321

### 322 **Neuronal correlates of behavioral tilt sensitivity**

323 We previously found that behavioral tilt sensitivity, which increases as a function of slant and has  
324 an inverted U-shape pattern as a function of distance from fixation (Chang et al., 2020a) (**Figure**  
325 **2C** and black curves in **Figure 5**), is correlated with neuronal tilt discriminability in CIP (Chang et  
326 al., 2020b). To test if a functional correlation between behavior and neuronal activity also exists  
327 for V3A, we calculated a tilt discrimination index (TDI; **Equation 2**) at each slant–distance  
328 combination for each neuron, following Chang et al. 2020b. Analogous to the SODI, the TDI  
329 quantifies the difference in responses to preferred and non-preferred tilts relative to the response  
330 variability. Notably, the mean TDI values in V3A followed the same trends as the behavioral  
331 sensitivity for slant (**Figure 5A**) and distance (**Figure 5B**). Indeed, the behavioral tilt sensitivities  
332 and TDI values were highly correlated across all sixteen slant–distance combinations (Monkey L:  
333 Spearman  $r = 0.92$ ,  $p = 2.2 \times 10^{-308}$ ; Monkey F:  $r = 0.98$ ,  $p = 2.2 \times 10^{-308}$ ; Monkey W:  $r = 0.74$ ,  $p =$   
334  $1.5 \times 10^{-3}$ ). Thus, neuronal tilt discriminability in both V3A and CIP was functionally correlated with  
335 the 3D tilt sensitivities of the monkeys across a wide range of viewing conditions.

336

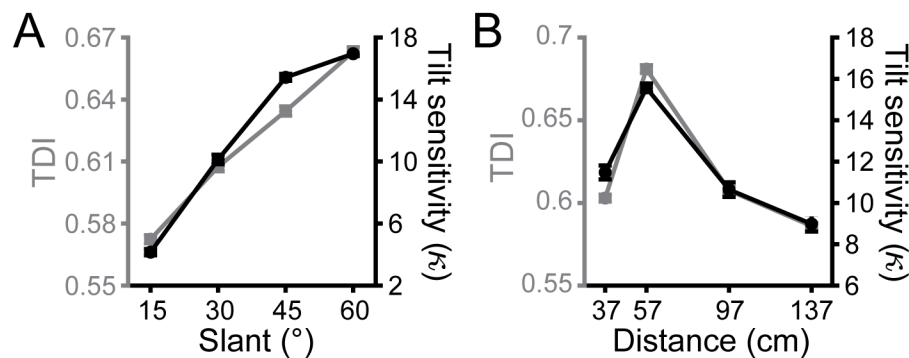

337

338 **Figure 5.** Neuronal correlates of tilt sensitivity. **(A)** Mean V3A TDI (gray) and behavioral tilt  
339 sensitivity (black) increased with slant. TDI values (behavioral sensitivities) were averaged across  
340 neurons (monkeys) and distances. **(B)** Mean V3A TDI and behavioral tilt sensitivity had an  
341 inverted U-shape relationship with distance. TDI values (behavioral sensitivities) were averaged  
342 across neurons (monkeys) and slants. Error bars are SEM.

343

### 344 V3A carries choice-related activity during 3D orientation discrimination

345 Previous studies found that roughly half of CIP neurons carried choice-related activity during 3D  
 346 orientation discrimination tasks (Elmore et al., 2019; Chang et al., 2020b). In contrast, one of  
 347 those studies also reported that choice-related activity was essentially non-existent in V3A, but  
 348 only tested 23 neurons (Elmore et al., 2019). Given that choice-related activity is preferentially  
 349 carried by CIP neurons with robust 3D pose tuning (Chang et al., 2020b), the dearth of V3A  
 350 choice-related activity in the Elmore study could have occurred if the small sample mostly included  
 351 neurons with low-level feature selectivity. Because that study was not designed to distinguish  
 352 between low-level visual feature selectivity and 3D pose tuning, it was important to reassess if  
 353 V3A carries choice-related activity.

354

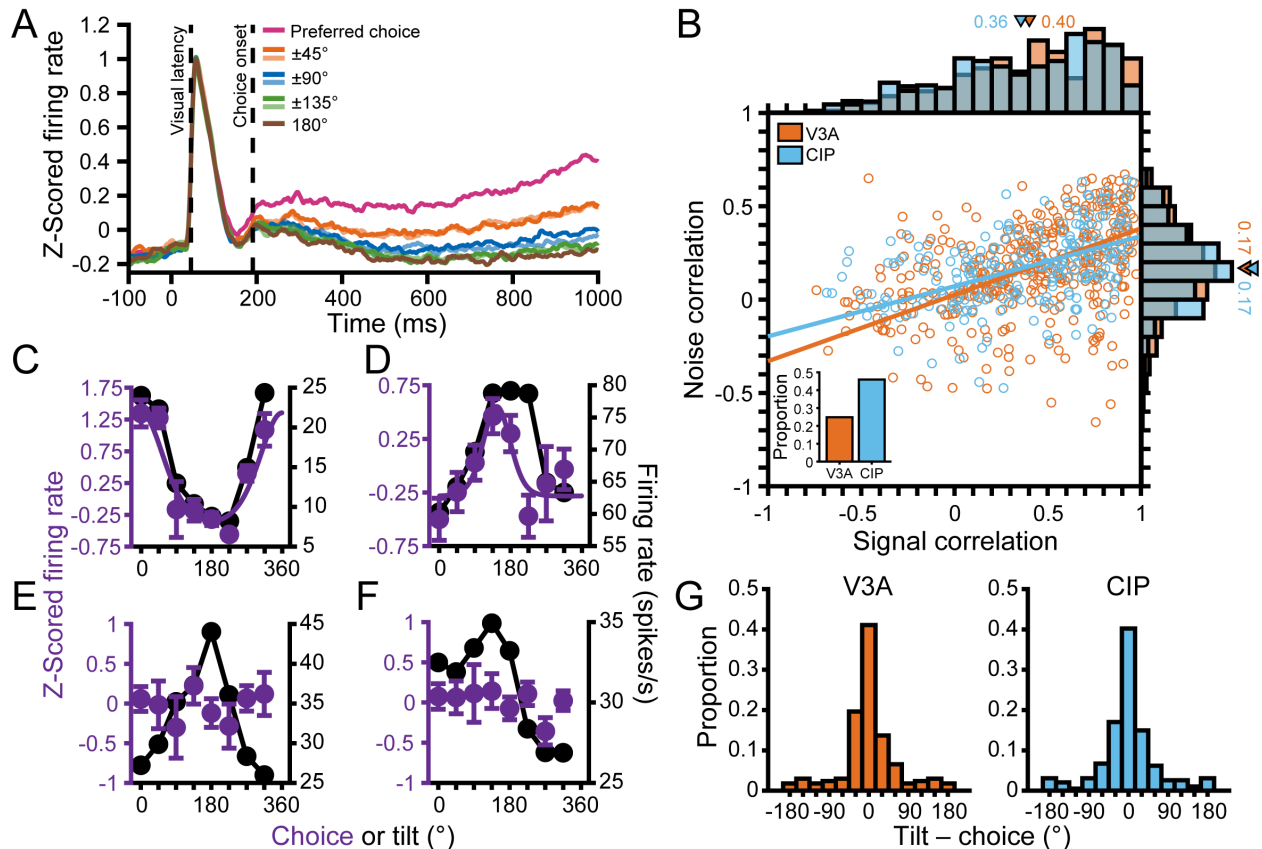

355

356 **Figure 6.** Choice tuning in V3A and its relationship to tilt tuning. (A) Population time courses for  
 357 each choice option relative to the preferred choice. Curves show z-scored responses averaged  
 358 over neurons. Stimulus onset = 0 ms. Vertical dashed lines mark the median visual response  
 359 latency (46 ms) and the onset of choice-related activity (191 ms). (B) Comparison of noise and  
 360 signal correlations in V3A (orange; N = 404 pairs) and CIP (blue; N = 244 pairs). Solid lines show  
 361 Type-II linear regression fits. Marginal histograms show the distributions of noise (right) and signal  
 362 (top) correlations. Triangles mark mean values. Inset shows proportion of neurons with choice-  
 363 related activity in V3A (25%) and CIP (46%). (C-F) Choice tuning curves (left axis, purple) and tilt  
 364 tuning curves marginalized over slant and distance (right axis, black) for the four example V3A



365 neurons from **Figure 3**. Data points show mean firing rate and error bars are SEM. Solid purple  
366 curves are von Mises fits for neurons with significant choice tuning only (ANOVA,  $p < 0.05$ ). Black  
367 lines are linear interpolations. (**G**) Comparison of preferred surface tilt and choice preferences in  
368 V3A (left,  $N = 168$ ) and CIP (right,  $N = 194$ ). The peaks near  $0^\circ$  indicate that the preferences  
369 generally aligned. Bars at  $\pm 180^\circ$  are identical.  
370

371 To dissociate choice-related and orientation-selective activity, we analyzed responses to  
372 frontoparallel planes ( $S = 0^\circ$  and tilt undefined, making them task ambiguous) only. To remove  
373 any distance-related response differences, we z-scored the responses at each distance and then  
374 pooled across distances. The responses were then grouped according to the monkey's reported  
375 tilt. We first computed eight population-level time courses aligned to the tilt choice that elicited the  
376 maximum response for each neuron (**Figure 6A**). Following an initial transient response, the eight  
377 time courses began to separate and showed parametric tuning with amplitudes that symmetrically  
378 fell off from the preferred choice (note the similarity of the  $\pm 45^\circ$ ,  $\pm 90^\circ$ , and  $\pm 135^\circ$  time courses),  
379 thus revealing choice-related activity in V3A. The onset of choice-related activity was defined as  
380 the first time point that the eight time courses significantly diverged (191 ms; ANOVA,  $p < 0.05$ ).  
381 In contrast, the onset of choice-related activity in CIP was 202 ms (see Figure 5A in Chang et al.,  
382 2020b). The finding that choice-related activity appeared first in V3A may reflect that choice  
383 signals in CIP contain a large bottom-up contribution from V3A.

384 Across the populations, 172 (25%) V3A and 201 (46%) CIP neurons carried significant  
385 choice-related activity (ANOVA,  $p < 0.05$ ; **Figure 6B**, inset bar plot). To test if the strength of  
386 choice-related activity also differed between the areas, we computed a choice discrimination  
387 index (CDI; **Equation 2**) for each neuron with significant choice tuning (the **Appendix** shows that  
388 this index is unaffected by z-scoring, which was used in calculating the choice tuning curves). The  
389 CDI values were highly similar in V3A (mean CDI =  $0.38 \pm 5.6 \times 10^{-3}$  SEM,  $N = 172$ ) and CIP (mean  
390 CDI =  $0.38 \pm 5.7 \times 10^{-3}$  SEM,  $N = 201$ ) and not significantly different (Wilcoxon rank sum test,  $p =$   
391  $0.20$ ). Thus, although there was a cross-area difference in the prevalence of choice-related  
392 activity, it was nevertheless present in V3A and similar in strength to CIP.

393 One potential reason that choice-related activity was more prevalent in CIP than V3A is a  
394 difference in the structure of correlated variability between the areas (Nienborg and Cumming,  
395 2006). To test this, we computed noise and signal correlations using the 3D pose data for pairs  
396 of neurons simultaneously recorded on the same tetrode (**Materials and methods**). The mean  
397 noise correlations were almost identical in V3A (mean  $r = 0.17 \pm 0.01$  SEM,  $N = 404$  pairs) and  
398 CIP (mean  $r = 0.17 \pm 0.01$  SEM,  $N = 244$  pairs), and not significantly different (Wilcoxon rank sum  
399 test,  $p = 0.62$ ; **Figure 6B**, right marginal histogram). However, noise correlations alone are not  
400 sufficient to account for differences in choice-related activity. Instead, the relationship between

401 noise and signal correlations matters (Liu et al., 2013; Cumming and Nienborg, 2016). We  
402 therefore quantified the signal correlations for the same pairs of neurons and found that they were  
403 also similar in V3A (mean  $r = 0.40 \pm 0.02$  SEM) and CIP (mean  $r = 0.36 \pm 0.03$  SEM), and not  
404 significantly different ( $p = 0.15$ ; **Figure 6B**, top marginal histogram). We then compared the  
405 relationship between noise and signal correlations (**Figure 6B**). As expected, higher noise  
406 correlations were associated with higher signal correlations (Shadlen et al., 1996; Cohen and  
407 Maunsell, 2009; Gu et al., 2011). Importantly, the linear relationship between noise and signal  
408 correlation was not significantly different between the areas (ANCOVA,  $p = 0.37$ ). Furthermore,  
409 between pairs of neurons within each area in which (i) both had choice-related activity, (ii) neither  
410 had choice-related activity, or (iii) one had but the other did not have choice-related activity, we  
411 found no significant differences in the magnitudes of noise (Kruskal-Wallis test, both  $p \geq 0.15$ )  
412 and signal (both  $p \geq 0.19$ ) correlations or their linear relationship (ANCOVA, both  $p \geq 0.23$ ). These  
413 results suggest that differences in the structure of correlated variability either within or across  
414 areas did not account for the presence of choice-related activity, and indicate that the cross-area  
415 difference in prevalence of choice-related activity was consistent with a stronger functional  
416 correlation between neuronal activity and 3D perceptual decisions in CIP than V3A.

417 Choice tuning curves are shown for the four example V3A neurons from **Figure 3** in **Figure**  
418 **6C-F**. The two neurons with higher Tolerances (**Figure 3A,B**) both carried choice-related activity  
419 (**Figure 6C,D**, purple curves). Notably, the tilt tuning curves (marginalized over slant and distance;  
420 **Figure 6C,D**, black curves) were well aligned with the choice tuning curves. In contrast, the  
421 neurons with intermediate and low tolerances (**Figure 3C,D**) did not carry choice-related activity  
422 (**Figure 6E,F**, purple points). To quantify the relationship between tilt and choice preferences for  
423 neurons with significant orientation and choice tuning, we took the circular difference between  
424 each neuron's preferred tilt (from the principal orientation) and preferred tilt choice (from the von  
425 Mises fit). In both areas, the median circular difference between the preferences (V3A:  $1.57^\circ$ ,  $N$   
426  $= 168$ ; CIP:  $-0.75^\circ$ ,  $N = 194$ ) was not significantly different from  $0^\circ$  (circular median test, both  $p \geq$   
427  $0.49$ ), indicating that the tilt and choice preferences tended to align (**Figure 6G**). To assess if the  
428 relationship between tilt and choice preferences differed between the areas, we compared the  
429 widths of the two distributions and found that they had similar circular variance (CV) values (V3A:  
430  $CV = 0.34$ ; CIP:  $CV = 0.33$ ) which were not significantly different (two-sample concentration  
431 difference test,  $p = 0.88$ ) (Fisher, 1995). Thus, the strength of the association between tilt and  
432 choice preferences was similar in V3A and CIP.

### 433 **Choice-related activity was associated with robust 3D tuning**

434 We previously found that CIP neurons with more robust 3D pose tuning (higher Tolerance values)  
435 preferentially carried choice-related activity (Chang et al., 2020b). To assess this relationship in  
436 V3A, we compared the Tolerance values of V3A neurons with and without choice-related activity  
437 (**Figure 7A**). Indeed, V3A neurons with choice-related activity had a mean Tolerance of  $0.65 \pm$   
438  $1.3 \times 10^{-2}$  SEM (N = 172) whereas those without choice-related activity had a mean Tolerance of  
439  $0.54 \pm 7.2 \times 10^{-3}$  SEM (N = 520), and the difference was significant (ANOVA followed by Tukey's  
440 HSD Test,  $p = 1.7 \times 10^{-7}$ ). Thus, choice-related activity was preferentially carried by V3A neurons  
441 with more robust 3D pose tuning, as in CIP.

442

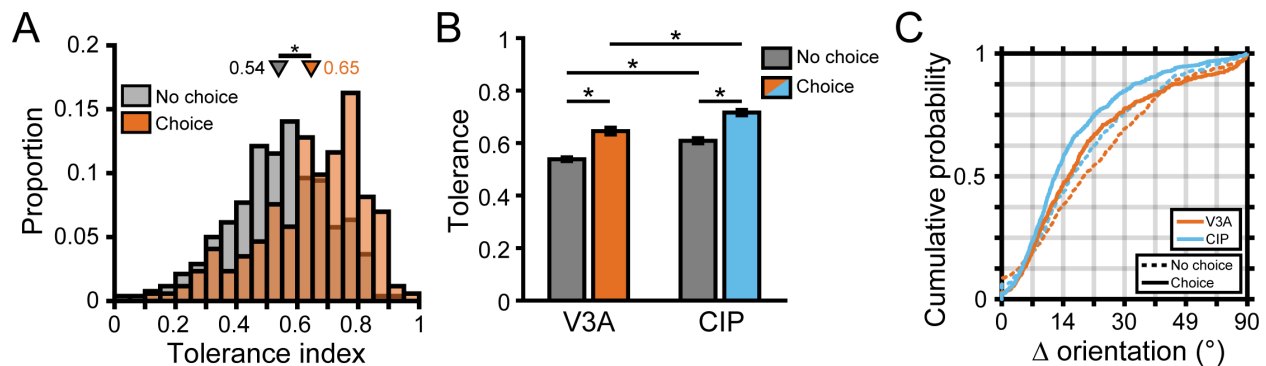

443

444 **Figure 7.** Robust 3D pose tuning was associated with choice-related activity. **(A)** Distribution of  
445 Tolerance values for V3A neurons with (orange bars, N = 172) and without (gray bars, N = 520)  
446 choice-related activity. Triangles mark mean Tolerances. **(B)** Cross-area comparison of Tolerance  
447 values for neurons with (colored bars) and without (gray bars) choice-related activity. The V3A  
448 data in **A** is reproduced in **B** for comparison with CIP. Bar height indicates mean Tolerance and  
449 error bars are SEM. Horizontal lines and asterisks indicate significant differences in **A,B** (ANOVA  
450 followed by Tukey's HSD test,  $p < 0.05$ ). **(C)** Cumulative density functions over the angular  
451 deviations between the orientation preference at each distance and the principal orientation for  
452 neurons with (solid lines) and without (dashed lines) choice-related activity.

453

454 Because more robust 3D pose tuning was associated with choice-related activity, we were  
455 concerned that the difference in 3D selectivity between V3A and CIP (**Figure 4**) simply reflected  
456 a cross-area difference in the prevalence of choice signals. However, this was not the case. First,  
457 Tolerance values were greater in CIP than V3A both for neurons with (ANOVA followed by  
458 Tukey's HSD Test,  $p = 3.8 \times 10^{-9}$ ) and without ( $p = 3.8 \times 10^{-9}$ ) choice-related activity (**Figure 7B**).  
459 Second, comparisons of the cumulative density functions over the angular deviations between  
460 orientation preferences at each distance and the principal orientation (**Figure 7C**) revealed  
461 significantly smaller deviations for neurons with than without choice-related activity in both areas  
462 (Kolmogrov-Smirnov test, both  $p \leq 1.1 \times 10^{-5}$ ). The deviations were also significantly smaller in CIP  
463 than V3A both for neurons with ( $p = 1.3 \times 10^{-4}$ ) and without ( $p = 8.8 \times 10^{-4}$ ) choice-related activity.

464 Thus, 3D pose tuning was more robust in CIP than V3A, regardless of whether the neurons carried  
 465 choice-related activity.

466

### 467 Hierarchical processing of presaccadic activity

468 Previous studies reported that V3A contains extraretinal signals associated with creating stable,  
 469 allocentric representations of the world (Galletti and Battaglini, 1989; Galletti et al., 1990; Sauvan  
 470 and Peterhans, 1999; Nakamura and Colby, 2002), as well as postsaccadic activity (Nakamura  
 471 and Colby, 2000). Recently, we discovered presaccadic activity in CIP that predicted the direction  
 472 and timing of eye movements (Chang et al., 2020b). We therefore hypothesized that hierarchical  
 473 transformations of saccade-related signals from V3A to CIP may occur in parallel to visual and  
 474 choice processing. To test this possibility, we trained the monkeys to perform a visually guided  
 475 (pop-up) saccade task (Munoz and Wurtz, 1995; Hanes and Schall, 1996) (**Figure 8A**).

476

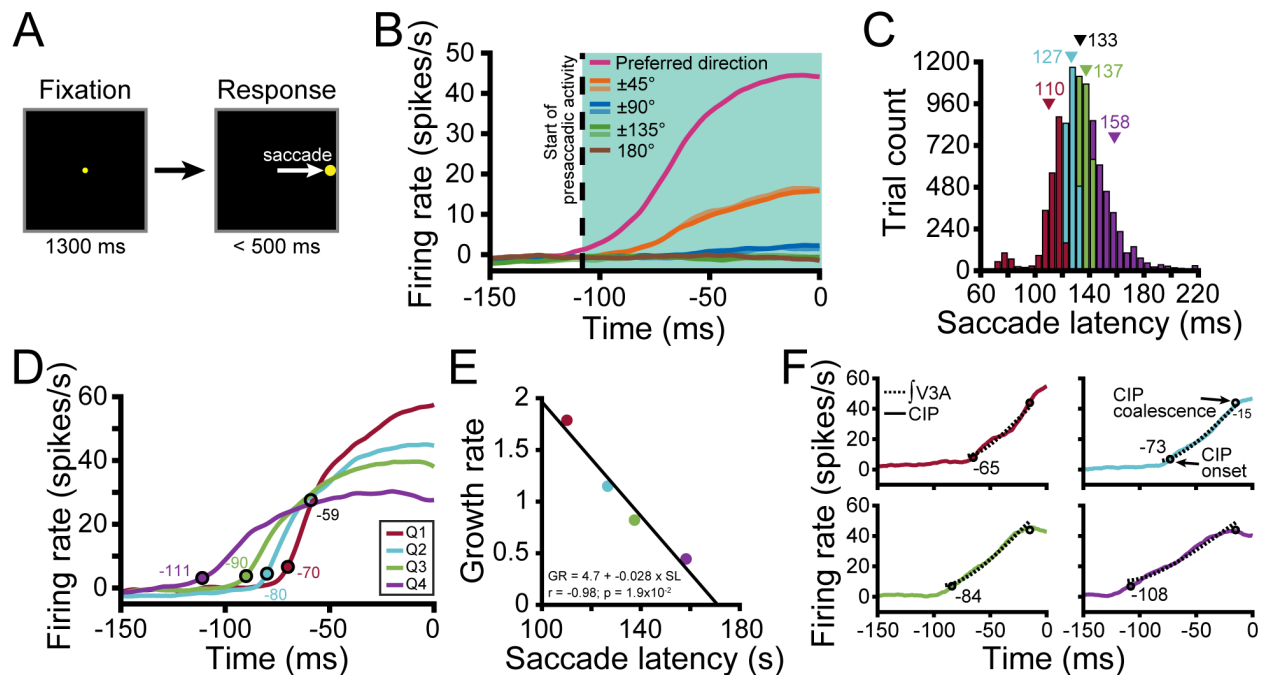

477

478

479 **Figure 8.** Presaccadic activity in V3A predicts CIP activity. (**A**) Pop-up saccade task. A target was  
 480 fixated for 1.3 s (matching the tilt discrimination task duration; left) after which it disappeared and  
 481 a single saccade target appeared at one of eight locations (matching the choice targets in the tilt  
 482 discrimination task; right). A saccade was then made to the target. (**B**) Population time courses  
 483 for each saccade direction relative to the preferred direction. Curves show responses averaged  
 484 over neurons. Saccade onset = 0 ms. Vertical dashed line marks the start of presaccadic activity  
 485 (-108 ms). (**C**) Histogram of saccade latencies divided into quartiles (Q). Triangles mark mean  
 486 values (black for the full distribution). (**D**) Time courses of presaccadic activity conditioned on the  
 487 saccade latency quartile. Colored circles mark the start of V3A activity for each quartile (ANOVA,  
 488  $p < 0.05$ ). Open black circle marks the point at which the V3A curves approximately coalesced.  
 489 (**E**) Inverse linear relationship between the growth rate (GR) of presaccadic activity and mean

490 saccade latency (SL) for each quartile. **(F)** The temporally integrated V3A time courses for each  
491 quartile (dashed curves) were well-aligned to the observed CIP time courses (solid curves).  
492 Circles mark the start of CIP activity for each quartile and the point at which the curves  
493 approximately coalesced.  
494

495 To first determine if V3A carries presaccadic activity, we computed eight population-level  
496 time courses relative to the saccade direction that elicited the maximum response for each neuron  
497 (**Figure 8B**). Noting that the time courses were parametrically tuned, we calculated the start of  
498 the activity by finding the first time point at which they significantly diverged (ANOVA,  $p < 0.05$ ).  
499 Intriguingly, presaccadic activity started in V3A (a classically defined ‘intermediate’ visual area)  
500 108 ms prior to saccade initiation, which was earlier than in CIP (102 ms; see Figure 8B in Chang  
501 et al., 2020b). This prompted us to test if the V3A activity predicted the timing of saccades. Each  
502 trial in which a saccade was made in the preferred saccade direction was labeled with the saccade  
503 latency (the time from target appearance to saccade initiation). The distribution of latencies was  
504 then divided into quartiles (**Figure 8C**) and the time course of presaccadic activity computed for  
505 each quartile (**Figure 8D**). On trials that the saccade latency was shorter, presaccadic activity  
506 started closer to the saccade initiation. Indeed, the growth rate (linear slope) from the start of  
507 presaccadic activity (ANOVA,  $p < 0.05$ ) to when the four curves approximately coalesced (59 ms  
508 before the saccade; **Materials and methods**) was highly correlated and inversely related to the  
509 mean saccade latency ( $r = -0.98$ ,  $p = 1.9 \times 10^{-2}$ ; **Figure 8E**). Intriguingly, these results indicate that  
510 V3A activity predicts the direction and timing of upcoming saccadic eye movements.

511 We further noted that the V3A time courses were visually more similar to step functions  
512 than the CIP time courses, which more closely resembled ramping activity. This observation was  
513 reflected in steeper growth rates for each quartile in V3A (Q1 = 1.8; Q2 = 1.1; Q3 = 0.82; Q4 =  
514 0.44) than CIP (Q1 = 0.73; Q2 = 0.61; Q3 = 0.56; Q4 = 0.39) and led us to hypothesize that CIP  
515 might temporally integrate presaccadic signals from V3A. For each latency quartile, we therefore  
516 integrated the V3A time courses from the onset of V3A activity to when the CIP time courses  
517 approximately coalesced (**Figure 8F**, dashed curves) and compared them to the observed CIP  
518 time courses (solid curves). Notably, the integrated V3A output aligned well with the CIP activity  
519 for each quartile, as might be expected if CIP accumulates evidence from V3A in favor of particular  
520 oculomotor responses. Further supporting the possibility of hierarchical presaccadic processing,  
521 the CIP time courses coalesced 15 ms before saccade initiation, compared to 59 ms in V3A,  
522 consistent with CIP being closer to the site of saccade initiation. These results imply that V3A is  
523 not simply a ‘visual area’ and suggest that there are parallel visual and presaccadic V3A-to-CIP  
524 hierarchies.



525 We next examined the saccade direction tuning of individual V3A neurons. Saccade  
 526 direction tuning curves for the four example V3A neurons are shown in **Figure 9A-D** (green  
 527 curves) along with von Mises fits for those with significant tuning (ANOVA,  $p < 0.05$ ). In total, 415  
 528 (60%) V3A neurons had significant saccade direction tuning, similar to in CIP (63%) (Chang et  
 529 al., 2020b). The V3A neurons showed parametric tuning for saccadic direction with responses  
 530 that fell off symmetrically from the preferred direction. Correspondingly, the tuning curves were  
 531 well described by von Mises functions (mean  $r = 0.92 \pm 0.47 \times 10^{-3}$  SEM,  $N = 415$ ).

532

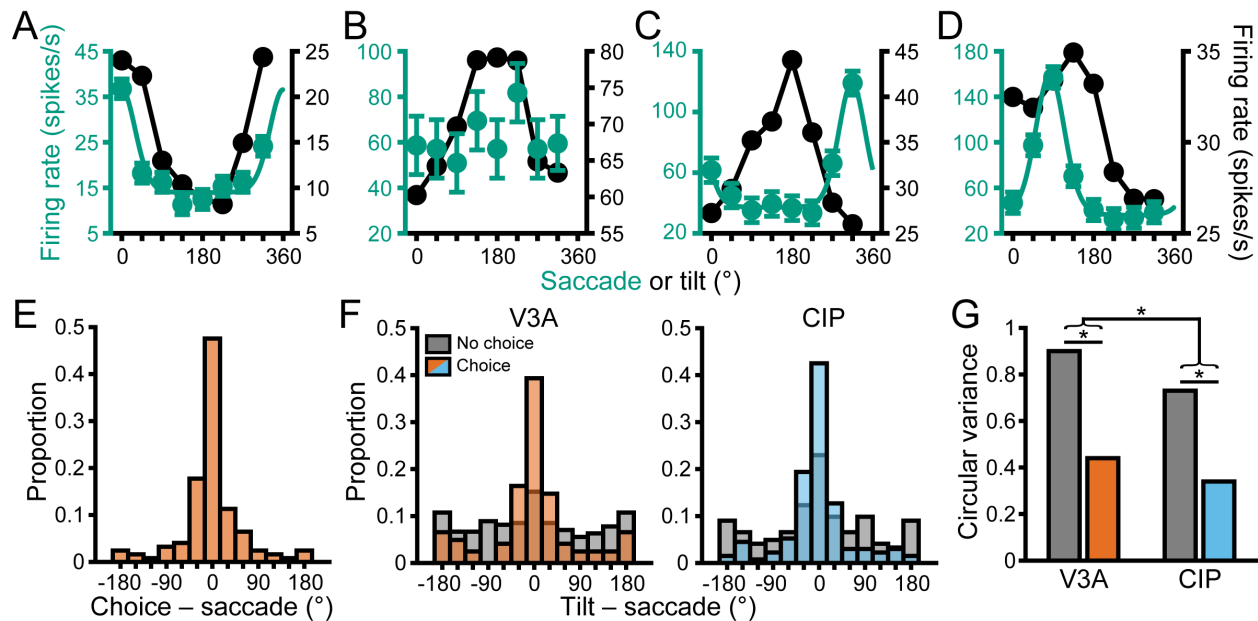

533

534 **Figure 9.** Sensorimotor associations were moderated by choice-related activity. (A-D) Saccade  
 535 direction tuning curves (left axis, green) and tilt tuning curves marginalized over slant and distance  
 536 (right axis, black) for the four example V3A neurons from **Figures 3.6**. Data points are mean firing  
 537 rates and error bars are SEM across trials. Solid green curves are von Mises fits for neurons with  
 538 significant saccade direction tuning (ANOVA,  $p < 0.05$ ). Black lines are linear interpolations. (E)  
 539 Differences between choice and saccade direction preferences in V3A ( $N = 124$ ). (F) Differences  
 540 between principal surface tilts and saccade direction preferences for neurons with (colored bars)  
 541 and without (gray bars) choice-related activity in V3A (left) and CIP (right). Bars at  $\pm 180^\circ$   
 542 are identical in E-F. (G) Comparison of circular variances for the distributions in F. Horizontal lines  
 543 and asterisks indicate significant differences (two-sample concentration difference test,  $p < 0.05$ ).

544

545 To test for cross-area differences in saccade direction tuning, we first calculated a saccade  
 546 discrimination index (SDI; **Equation 2**) for neurons with significant tuning. Surprisingly, saccade  
 547 direction was more discriminable based on V3A (mean SODI =  $0.49 \pm 0.62 \times 10^{-3}$  SEM,  $N = 415$ )  
 548 than CIP (mean SODI =  $0.41 \pm 0.62 \times 10^{-3}$  SEM,  $N = 274$ ) responses, and the difference was  
 549 significant (Wilcoxon rank sum test,  $p = 4.8 \times 10^{-17}$ ). We further compared the tuning bandwidths  
 550 ( $\kappa$  from the von Mises fits) and found that the V3A tuning curves were narrower (mean  $\kappa = 6.3 \pm$

551 0.26 SEM; N = 415) than the CIP tuning curves (mean  $\kappa = 4.7 \pm 0.29$  SEM; N = 274), and the  
552 difference was significant ( $p = 1.9 \times 10^{-7}$ ). These results are consistent with convergent input from  
553 multiple V3A neurons onto individual CIP neurons, and parallel the cross-area difference in 3D  
554 orientation tuning.

555 We additionally wanted to assess if choice-related and presaccadic activity were  
556 functionally dissociable in V3A, as they are in CIP (Chang et al., 2020b). Across the V3A  
557 population, 124 neurons (18%) had both choice-related and presaccadic activity. For this  
558 subpopulation, choice and saccade preferences generally aligned (**Figure 9E**). The median  
559 circular difference ( $-1.7^\circ$ ) between the preferences was not significantly different from  $0^\circ$  (circular  
560 median test,  $p = 0.65$ ). Although the preferences aligned, other characteristics were distinct. First,  
561 the saccade tuning curves were narrower (mean  $\kappa = 6.3 \pm 0.26$  SEM) than the choice tuning  
562 curves (mean  $\kappa = 4.7 \pm 0.46$  SEM), and the difference was significant (Wilcoxon rank sum test,  $p$   
563  $= 6.4 \times 10^{-11}$ ). Second, some neurons carried choice-related (48, 7%) or presaccadic (291, 42%)  
564 activity only, indicating that the properties were not mutually inclusive. Third, choice-related  
565 activity was associated with more robust 3D tuning whereas presaccadic activity was associated  
566 with less robust 3D tuning (**Figure 9—figure supplement 1**), indicating that choice and saccade  
567 signals had opposite functional relationships with 3D selectivity in V3A. These results together  
568 suggest that choice-related and presaccadic activity were functionally distinct.

569

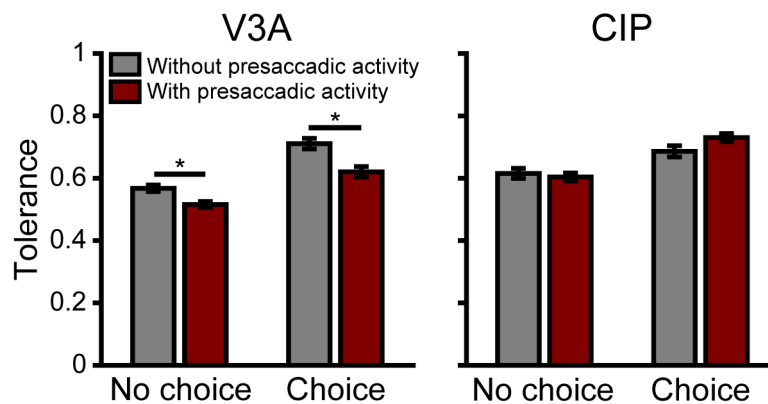

570

571 **Figure 9—figure supplement 1.** Presaccadic activity was associated with less robust 3D tuning  
572 in V3A, but not CIP. Tolerance values were compared for neurons with and without presaccadic  
573 activity, condition on the presence of choice-related activity in V3A and CIP. Four neuronal  
574 subpopulations were defined: those with (1) choice-related and presaccadic activity (C+S+, V3A:  
575 N = 124; CIP: N = 137), (2) choice-related but not presaccadic activity (C+S-, V3A: N = 48; CIP:  
576 N = 64), (3) no choice-related but presaccadic activity (C-S+, V3A: N = 291; CIP: N = 137), and  
577 (4) neither choice-related nor presaccadic activity (C-S-, V3A: N = 229; CIP: N = 99). First, we  
578 compared neurons with choice-related activity (C+S+ and C+S-). Tolerance values were  
579 significantly lower for C+S+ than C+S- neurons in V3A ( $p = 6.9 \times 10^{-3}$ ) but not CIP ( $p = 0.23$ ).  
580 Second, we compared neurons without choice-related activity (C-S+ and C-S-). Tolerance values

581 were significantly lower for C-S+ than C-S- neurons in V3A ( $p = 1.9 \times 10^{-3}$ ) but not CIP ( $p = 0.94$ ).  
582 Thus, presaccadic activity was associated with less robust 3D tuning in V3A. There was no  
583 significant relationship between presaccadic activity and the robustness of 3D tuning in CIP.  
584 Horizontal lines and asterisks indicate significant differences (ANOVA followed by Tukey's HSD  
585 test,  $p < 0.05$ ).  
586

### 587 **Sensorimotor associations are moderated by choice-related activity**

588 Neurons in CIP form associations between their surface orientation and choice/saccade direction  
589 preferences such that the alignment of the tuning curves reflects whether the monkey was trained  
590 to report the near or far side of the plane (Elmore et al., 2019; Chang et al., 2020b). However, the  
591 existence of a similar sensorimotor association was not immediately evident based on the  
592 saccade direction and tilt tuning curves (marginalized over slant and distance) of the example  
593 V3A neurons (**Figure 9A-D**). Assuming that decision-related processing occupies an intermediate  
594 position between sensory and motor activity, it is possible that choice signals have a moderating  
595 effect on the sensorimotor association that could obscure the relationship if not taken into  
596 consideration. Indeed, we previously found that the strength of the sensorimotor association in  
597 CIP depended on the presence of choice signals (Chang et al., 2020b).

598 To test for sensorimotor associations in V3A and evaluate the potential moderating effect  
599 of choice signals, we therefore calculated the angular difference between the principal tilt (from  
600 the principal orientation) and saccade direction preference for neurons with and without choice-  
601 related activity (**Figure 9F**, left, orange and gray bars, respectively). For neurons without choice-  
602 related activity, there was no discernible association between the tilt and saccade direction  
603 preferences since the distribution was not significantly different from uniform (Rayleigh test,  $p =$   
604  $0.08$ ,  $N = 270$ ). However, for neurons with choice-related activity, the distribution was significantly  
605 different from uniform ( $p = 1.2 \times 10^{-18}$ ,  $N = 122$ ) and the median circular difference ( $-1.6^\circ$ ) was not  
606 significantly different from  $0^\circ$  (circular median test,  $p = 0.42$ ), revealing a sensorimotor association.  
607 Correspondingly, the distribution of preference differences was significantly narrower for neurons  
608 with ( $CV = 0.44$ ) than without ( $CV = 0.9$ ) choice-related activity (two-sample concentration  
609 difference test,  $p = 1.4 \times 10^{-5}$ ; **Figure 9G**). Thus, a sensorimotor association was only evident for  
610 V3A neurons with choice-related activity.

611 When we repeated this analysis for CIP, we found a striking difference from V3A (**Figure**  
612 **9F**, right). Specifically, sensorimotor associations were evident regardless of whether the neurons  
613 carried choice signals. The distributions of preference differences were significantly different from  
614 uniform both for neurons with (blue bars;  $p = 3.7 \times 10^{-29}$ ,  $N = 134$ ) and without (gray bars;  $p =$   
615  $9.7 \times 10^{-5}$ ,  $N = 122$ ) choice-related activity. Likewise, the median differences were not significantly  
616 different from  $0^\circ$  both for neurons with ( $-4.2^\circ$ ,  $p = 0.14$ ) and without ( $-3.2^\circ$ ,  $p = 0.65$ ) choice-related

617 activity. This reveals that choice signals were not necessary for sensorimotor associations in CIP,  
618 but the distribution was significantly narrower for neurons with (CV = 0.34) than without (CV =  
619 0.73) choice-related activity (two-sample concentration difference test,  $p = 2.6 \times 10^{-5}$ ; **Figure 9G**),  
620 indicating that sensorimotor associations were strongest for neurons with choice-related activity.

621 We further assessed the cross-area difference in the overall strength of sensorimotor  
622 associations by comparing the widths of the V3A and CIP preference difference distributions  
623 (including neurons with and without choice-related activity). The distribution was significantly  
624 broader in V3A (CV = 0.77) than CIP (CV = 0.53;  $p = 1.2 \times 10^{-3}$ ), indicating that sensorimotor  
625 associations were strongest in CIP (**Figure 9G**). These results thus imply a hierarchical  
626 transformation in the strength of sensorimotor associations along the ‘where’ pathway and  
627 suggest a novel role for choice-related activity in sensorimotor processing as explored next.

628 The above analyses showed that neurons with choice-related activity exhibited more  
629 robust 3D pose tuning (**Figure 7**) and formed stronger sensorimotor associations (**Figure 9G**). If  
630 choice signals occupy an intermediate position between sensory and motor processing, the  
631 strength of sensorimotor associations might depend on the robustness of 3D tuning for neurons  
632 with choice-related activity but not those without choice-related activity. In other words, choice-  
633 related activity may statistically moderate (Judd et al., 2014) the relationship between the  
634 robustness of 3D pose tuning and the strength of sensorimotor associations. To test this, we ran  
635 a linear regression model where the absolute angular difference between the principal tilt and  
636 saccade direction preference depended on Tolerance, choice-related activity, and their  
637 interaction. Both areas showed a significant interaction (both  $p \leq 1.6 \times 10^{-3}$ ) such that Tolerance  
638 had a negligible impact on the strength of the sensorimotor association for neurons without  
639 choice-related activity (V3A: slope = 0.16; CIP: slope = -0.15) but a strong impact for neurons with  
640 choice-related activity (V3A: slope = -2.2; CIP: slope = -2.5). Thus, this analysis revealed an  
641 intricate relationship between sensory, choice, and presaccadic activity in which choice signals  
642 moderated the relationship between the robustness of 3D tuning and sensorimotor associations.

643

## 644 **Discussion**

645 Transforming ambiguous 2D retinal images into relevant 3D object representations that can guide  
646 action is a fundamental function of the dorsal ‘where’ pathway. Here we explicated the parallel  
647 processing, hierarchical transformations, and functional associations of visual, choice, and  
648 presaccadic signals at the juncture of visual and parietal cortex. Our findings challenge classical  
649 notions of sensorimotor dichotomies by revealing that V3A possesses presaccadic activity and  
650 defining properties of association cortex, and further implicate choice-related activity as a novel

651 factor in moderating sensorimotor processing.

652

### 653 **Parallel processing, hierarchical transformations, and sensorimotor associations**

654 Multiple lines of evidence converged to support parallel V3A-to-CIP hierarchies. Focusing first on  
655 the visual hierarchy, we found that the median visual response latency in V3A was 6 ms shorter  
656 than in CIP and that receptive fields were smaller in V3A than CIP. At a functional level, 3D  
657 orientation and position information (which are confounded in retinal images) were more  
658 separable in CIP than V3A, implying a hierarchical resolution of sensory ambiguities that limit the  
659 ability to make 3D perceptual inferences. Anatomical data also point to a V3A-to-CIP hierarchy  
660 (Baizer et al., 1991; Nakamura et al., 2001). However, this conclusion could be challenged based  
661 on the finding of better 3D orientation discrimination using V3A than CIP responses (Elmore et  
662 al., 2019). The current findings corroborated that result but also reconciled the apparent  
663 contradiction by revealing a tradeoff between selectivity and invariance as visual information  
664 ascended the pathway (Ziemba and Simoncelli, 2021).

665 Intriguingly, our findings also support a V3A-to-CIP saccade-related hierarchy. While  
666 presaccadic activity that predicted the direction and timing of eye movements was prevalent in  
667 both areas, it began 6 ms earlier in V3A than CIP (in agreement with the difference in visual  
668 response latencies). The time course of presaccadic activity in CIP also closely resembled the  
669 temporally integrated V3A output. These findings may suggest that some presaccadic signals  
670 originate in a region of visual cortex whose feedforward input includes V1 and V2 (Zeki, 1980;  
671 Felleman and Van Essen, 1991), thus challenging classical notions of sensorimotor dichotomies.  
672 They are also consistent with CIP accumulating evidence provided by V3A in favor of particular  
673 oculomotor responses. This raises the possibility that some of the integration-like properties of  
674 LIP (Shadlen and Newsome, 1996; Roitman and Shadlen, 2002), which is architectonically  
675 distinct from CIP (Katsuyama et al., 2010; Niu et al., 2020), may reflect bottom-up input from other  
676 areas such as CIP (Lewis and Van Essen, 2000; Premereur et al., 2015; Van Dromme et al.,  
677 2016). In that case, inactivating CIP might impair saccadic responses during decision-making  
678 tasks. Consistent with this, reversible inactivation of CIP during a depth structure categorization  
679 task was found to delay saccadic responses (Van Dromme et al., 2016). While that delay may  
680 have reflected degraded visual discrimination, the current findings also point to the possibility of  
681 impaired saccade preparation. Future experiments utilizing a battery of saccade tasks (Munoz  
682 and Wurtz, 1995) can further elucidate the saccade-related properties of V3A and CIP.

683 Many V3A neurons showed functional associations between their orientation, choice, and  
684 saccade direction preferences, as in CIP (Elmore et al., 2019; Chang et al., 2020b). Finding these



685 associations in V3A implies that sensorimotor processing traditionally linked to parietal cortex  
686 already occurs in an ‘intermediate visual area’, suggesting that V3A may be more appropriately  
687 classified as an early association region. Intriguingly, saccade direction discrimination was greater  
688 in V3A (where presaccadic activity was associated with poorer 3D pose tuning) while  
689 sensorimotor associations were stronger in CIP (where no relationship between presaccadic  
690 activity and the robustness of 3D tuning was evident). These cross-area differences may reflect  
691 a transition from lower-level representations of presaccadic signals to higher-level sensorimotor  
692 associations, and parallel the observed changes in visual feature selectivity.

693

### 694 **Visual processing in V3A**

695 Previous studies arrived at categorically different conclusions regarding visual processing in V3A  
696 (Gaska et al., 1987, 1988; Galletti and Battaglini, 1989; Galletti et al., 1990; Sauvan and  
697 Peterhans, 1999; Nakamura and Colby, 2000, 2002; Tsao et al., 2003; Anzai et al., 2011; Elmore  
698 et al., 2019). Our large V3A sample revealed a heterogeneous population in which neurons  
699 ranged from representing low-level visual features to high-level object properties. Earlier  
700 discrepancies may reflect a combination of this heterogeneity, small sample sizes, and the  
701 possibility of functionally distinct modules within V3A. Another factor that may have contributed to  
702 the discrepancies is variability in how V3A was defined (Nakhla et al., 2021), highlighting the  
703 continued importance of using functional and anatomical localization methods in future  
704 investigations of this relatively understudied area.

705 For some V3A neurons, we found that orientation tuning curve shape (but not gain) was  
706 highly tolerant to distance, implying 3D pose tuning. Because the perspective cues in our stimuli  
707 were independent of distance, the gain changes must have been driven by stereoscopic cues.  
708 This implies that these neurons were selective for gradients of relative disparity. Other V3A  
709 neurons showed orientation tuning at a single distance. These neurons may have been selective  
710 for absolute disparity gradients, similar to some middle temporal (MT) area neurons (Nguyenkim  
711 and DeAngelis, 2003). Such neurons may reflect an intermediate stage of visual processing  
712 whose outputs are combined to create 3D pose representations. Selectivity for absolute disparity  
713 gradients may further account for suppressive effects previously reported within the classical  
714 receptive fields of V3A neurons (Gaska et al., 1987) since the stimuli were presented at screen  
715 distance only and therefore would stimulate portions of the receptive field with non-preferred  
716 disparities. Lastly, the orientation tuning curve shape of some V3A neurons was highly distance-  
717 dependent, which may reflect tuning for a single absolute disparity. Future studies that perform  
718 detailed receptive field sub-mapping of disparity selectivity will be important to explicate the

719 heterogeneity of V3A as well as the transformations by which the visual system achieves 3D pose  
720 tuning. One possibility is that absolute disparity representations (in V1) are used to construct  
721 absolute disparity gradient detectors (in V3A, MT) and then pose selectivity (in V3A, PIP, CIP).

722

### 723 **Origins and functional implications of choice signals**

724 Contemporary interpretations of choice signals include a mix of feedforward contributions to  
725 decision processes, the structure of correlated variability, attention, cognitive and behavioral  
726 factors, as well as feedback (Celebrini and Newsome, 1994; Britten et al., 1996; Dodd et al., 2001;  
727 Haefner et al., 2013; Gu et al., 2014; Ruff and Cohen, 2014; Smolyanskaya et al., 2015; Cumming  
728 and Nienborg, 2016). Despite these complexities, the current findings are consistent with a  
729 feedforward cascade and build-up of choice signals which may reflect greater contributions of CIP  
730 than V3A to 3D perceptual decisions. First, choice-related activity appeared 11 ms earlier in V3A  
731 than CIP. Second, it was about twice as prevalent in CIP as V3A. Notably, the structure of  
732 correlated variability could not account for the prevalence of choice-related activity either within  
733 or across areas. Third, choice-related activity was preferentially carried by neurons with 3D  
734 orientation tuning that was more tolerant to distance. This is consistent with reports that neurons  
735 which carry choice signals tend to have resolved sensory ambiguities about the information being  
736 discriminated, allowing them to more directly contribute to decisions (Liu et al., 2013; Chang et  
737 al., 2020b). Although choice signals may be confounded with feature-based attentional  
738 modulation (Cohen and Newsome, 2008), this is unlikely to explain our findings. Attention is  
739 largely associated with changes in response magnitude (Reynolds and Heeger, 2009). However,  
740 we found more intricate relationships in which choice-related activity: (i) was associated with  
741 changes in tuning curve shape that made 3D orientation tuning more tolerant to distance (Chang  
742 et al., 2020b) and (ii) statistically moderated the strength of sensorimotor associations such that  
743 visual and saccade direction preferences were best aligned for neurons which carried choice  
744 signals. Indeed, the strength of sensorimotor associations strongly depended on the robustness  
745 of 3D pose tuning for neurons with (but not without) choice-related activity. These findings thus  
746 reveal a multifaceted landscape of functional associations between sensory, choice-, and motor-  
747 related activity. They further imply a novel role for choice signals in sensorimotor processing that  
748 might reflect the temporal cascade of sensory processing, response selection, and motor action.

749

### 750 **Materials and methods**

#### 751 **Animal preparation**

752 All procedures followed the National Institutes of Health's Guide for the Care and Use of

753 Laboratory Animals and were approved by the Institutional Animal Care and Use Committee at  
754 the University of Wisconsin – Madison (Protocol G005229). Three male rhesus monkeys (*Macaca*  
755 *mulatta*; Monkey L: 6 years of age; Monkey F: 5 years; Monkey W: 5 years) were surgically  
756 implanted with a Delrin ring for head restraint and a removable recording grid for guiding  
757 electrodes. After recovery, they were trained to sit in a primate chair with head restraint and to  
758 fixate visual targets within 2° version and 1° vergence windows for liquid rewards.

759

### 760 **Experimental control and stimulus presentation**

761 Experimental control was performed using the REC-GUI software (RRID:SCR\_019008) (Kim et  
762 al., 2019). Stimuli were rendered using Psychtoolbox 3 (MATLAB R2016b; NVIDIA GeForce GTX  
763 970) and rear-projected onto a polarization preserving screen (Stewart Film Screen, Inc.) using a  
764 DLP LED projector (PROPixx; VPixx Technologies, Inc.) with 1,280 x 720 pixel resolution (70° x  
765 43° of visual angle) at 240 Hz. A circular polarizer was used to sequence the presentation of  
766 stereoscopic ‘half-images’ to each eye (120 Hz/eye). Polarized glasses were worn. A  
767 phototransistor circuit was used to confirm the synchronization of the left and right eye images as  
768 well as align neuronal responses to the stimulus onset. Eye tracking was performed optically at 1  
769 kHz (EyeLink 1000 plus, SR Research). The monkeys sat 57 cm from the screen.

770

### 771 **Visual stimuli**

772 The stimuli were previously described in detail (Chang et al., 2020a,b). Briefly, planar surfaces  
773 subtending 20° of visual angle were presented at the center of the screen. They were defined by  
774 250 nonoverlapping dots that were uniformly distributed across the plane and rendered with  
775 stereoscopic and perspective cues. Surface orientation was described using tilt and slant  
776 (Stevens, 1983; Rosenberg et al., 2013). All combinations of eight tilts (0° to 315°, 45° steps) and  
777 four slants (15° to 60°, 15° steps) plus the frontoparallel plane (tilt undefined, slant = 0°) were  
778 presented (N = 33). All orientations were presented at four distances (37, 57, 97, and 137 cm; N  
779 = 132 unique poses). The dots were scaled with distance such that their screen size only  
780 depended on slant. At a slant of 0°, each dot subtended 0.35°.

781 The fixation point subtended 0.3° and was always at 57 cm (screen distance). Keeping its  
782 distance constant while varying the plane’s distance was a key design feature (Nguyenkim and  
783 DeAngelis, 2003; Hegde and Van Essen, 2005; Ban and Welchman, 2015; Alizadeh et al., 2018;  
784 Henderson et al., 2019) that conferred two advantages over yoking the distance of the stimulus  
785 and fixation point (Banks et al., 2001; Hillis et al., 2004). First, it ensured that the monkeys could  
786 not rely on local absolute disparity cues to judge 3D orientation (Elmore et al., 2019; Chang et al.,

787 2020a,b). Second, it allowed us to dissociate the effects of stimulus distance and vergence signals  
788 (which would have otherwise been confounded) on the neuronal responses, which is important  
789 because V3A and CIP carry extraretinal signals.

790

## 791 **Experimental protocol**

792 *Tilt discrimination task.* The monkeys performed an eight-alternative forced choice (8AFC) tilt  
793 discrimination task (Chang et al., 2020a,b). Each trial began by fixating a circular target at the  
794 center of the screen for 300 ms. A planar surface then appeared for 1 s. The fixation target and  
795 plane then disappeared and eight choice targets corresponding to the eight possible tilts appeared  
796 at polar angles of 0° to 315° in 45° steps (11° eccentricity). The nearest side of the plane was  
797 indicated by making a saccade to the corresponding target (e.g., the right target for a right-near  
798 plane) in exchange for a liquid reward for correct responses. Because frontoparallel planes were  
799 task ambiguous (tilt is undefined at slant = 0°), responses to those stimuli were rewarded with  
800 equal probability (12.5%).

801 *Visually guided saccade task.* The monkeys also performed a visually guided (pop-up)  
802 saccade task (Chang et al., 2020b). The timing was matched to the tilt discrimination task. Each  
803 trial began by fixating a target (identical to the target in the tilt discrimination task) at the center of  
804 the screen for 1.3 s. The fixation target then disappeared and a single saccade target appeared  
805 at one of the eight choice target locations. A saccade to the target was made for a liquid reward.

806 The two tasks were interleaved within a block design. For all CIP and 422 V3A neurons,  
807 each block included one completed trial for each of the following: (i) tilt discrimination task: (8 tilts  
808 x 4 non-zero slants + 8 frontoparallel planes) x 4 distances (160 trials) and (ii) saccade task: 8  
809 directions x 4 repeats (32 trials). For 270 V3A neurons, each saccade direction was repeated  
810 once per block. Trials were aborted and the data discarded if fixation was broken before the  
811 choice/saccade target(s) appeared, or if a response was not provided within 500 ms. A minimum  
812 of five blocks was required to include a neuron for analysis.

813

## 814 **Behavioral data analysis**

815 Tilt discrimination performance was quantified by calculating the distribution of reported tilt errors  
816 ( $\Delta\text{Tilt}$  = reported tilt – presented tilt) and fitting a von Mises probability density function:

817

$$818 \quad VM(\Delta\text{Tilt}) = e^{\kappa \cos(\Delta\text{Tilt} - \mu)} / (2\pi \cdot I_0(\kappa)). \quad (\text{equation 1})$$

819

820 The mean ( $\mu$ ) and concentration ( $\kappa$ ) parameters describe the accuracy and sensitivity,  
821 respectively (Seilheimer et al., 2014; Dakin and Rosenberg, 2018). Values of  $\mu$  closer to 0°

822 indicate greater accuracy and larger  $\kappa$  indicate greater sensitivity. An upper bound of  $\kappa = 18$  was  
823 set in the estimation routine (Chang et al., 2020a,b). A modified Bessel function of order 0,  $I_0(\kappa)$ ,  
824 normalizes the function to have unit area.

825

## 826 **Neuronal recordings**

827 To target the areas, magnetic resonance imaging (MRI) scans were collected on a 3-Tesla GE  
828 MR750 scanner before and after implanting the head restraint ring. To estimate the penetration  
829 trajectories, the CARET software was used to register the structural scans to the F99 atlas (Van  
830 Essen et al., 2001) and to align the recording grid (Rosenberg et al., 2013; Rosenberg and  
831 Angelaki, 2014b, a; Chang et al., 2020b). During penetrations, observed gray/white matter and  
832 sulcal transitions were referenced to the MRI. Area CIP is located in the caudal portion of the  
833 lateral bank of the intraparietal sulcus and ventral to LIP. Area V3A is located adjacent to and  
834 ventral-laterally to CIP. There is a swath of white matter dorsal to V3A and lateral to CIP.

835 The recordings were performed using linear array probes with either four or eight tetrodes  
836 (NeuroNexus, Inc). The tetrodes were separated by 300  $\mu\text{m}$  and electrodes within a tetrode were  
837 separated by 25  $\mu\text{m}$ . Neuronal signals (sampled at 30 kHz) along with eye position and  
838 phototransistor signals (each sampled at 1 kHz) were stored using a Scout Processor (Ripple,  
839 Inc.). Tetrode-based spike sorting was performed offline using the KlustaKwik (K. Harris) semi-  
840 automatic clustering algorithm in MClust (MClust-4.0, A.D. Redish et al.) followed by manual  
841 refinement using Offline Sorter (Plexon, Inc.). Only well-isolated single neurons verified by at least  
842 two authors were included.

843

## 844 **Receptive field mapping and analysis**

845 Initial receptive field (RF) estimates were made by hand-mapping with patches of random dots,  
846 sinusoidal gratings, and/or orientated bars. During hand-mapping, fixation was maintained on a  
847 target ( $0.3^\circ$ ) at the center of the screen and a liquid reward was provided every 2-3 s of continuous  
848 fixation. Breaks in fixation resulted in the disappearance of the fixation point and stimulus for 1 s.  
849 An automated stimulus in which white and black squares were flashed one square at a time was  
850 then presented on a gray background. For V3A,  $2^\circ \times 2^\circ$  squares tiled a region centered on and  
851 larger than the hand estimate. For CIP, the squares were  $4^\circ \times 4^\circ$  and tiled the entire screen. A  
852 monkey was required to first fixate a target ( $0.3^\circ$ ) at the center of the screen for 300 ms. Then,  
853 while maintaining fixation, the squares were flashed (150 ms duration) in an alternating sequence  
854 at pseudorandom locations. A liquid reward was provided after every 20 flashes. If fixation was  
855 broken, the monkey was required to again fixate the target for 300 ms before the sequence



856 resumed. A single repetition was completed when both white and black squares had been flashed  
857 at every location. At least five repetitions were collected each session.

858 The RF boundary was estimated offline by calculating the firing rate at each tiled location,  
859 averaging over the white and black square responses. The responses at each location were then  
860 compared to baseline, calculated using the last 150 ms of the fixation periods preceding the  
861 stimulus sequences, to identify significant responses (ANOVA,  $p < 0.05$ ). The RF map was then  
862 manually smoothed and an envelope contour drawn. This procedure produced RF estimates for  
863 355 (51%) V3A and 112 (26%) CIP neurons. The cross-area difference in the proportion of  
864 neurons for which a RF could be estimated may reflect that the mapping stimulus was likely more  
865 appropriate for lower- than higher-level visual areas.

866

## 867 **Neuronal data analyses**

868 *Visual response latency.* For each neuron, spike trains were aligned to the stimulus onset using  
869 the phototransistor signal. Each spike train (1 ms bins) was convolved with a double exponential  
870 function and then averaged across trials to create spike density functions (SDFs) (Chang et al.,  
871 2020b). A neuron's visual latency was defined as the first time point after the stimulus onset where  
872 the SDF significantly deviated (ANOVA followed by Tukey's HSD test,  $p < 0.05$ ) from the baseline  
873 activity (calculated using the last 150 ms of the fixation periods preceding the stimuli). Firing rates  
874 were calculated from the area's median visual latency to the end of the stimulus presentation.

875 *Discrimination indices (DIs).* We calculated DIs to quantify how well preferred and non-  
876 preferred conditions could be discriminated from single neuron responses (Prince et al., 2002):

877

$$878 \quad DI = \frac{R_{max} - R_{min}}{R_{max} - R_{min} + 2\sqrt{SSE/(N-M)}}. \quad (\text{equation 2})$$

879

880 Here,  $R_{max}$  and  $R_{min}$  are the maximum and minimum mean responses across the tuning  
881 curve,  $SSE$  is the sum squared error around the mean responses for each condition,  $N$  is the total  
882 number of trials, and  $M$  is the number of conditions. Four DIs were computed following **Equation**  
883 **2**. A surface orientation discrimination index (SODI) was used to quantify how well the 3D  
884 orientation (over all slant-tilts) could be discriminated at each distance ( $M = 33$ ). A tilt  
885 discrimination index (TDI) was used to quantify how well the tilt could be discriminated at given  
886 slant-distance combinations ( $M = 8$ ). A choice discrimination index (CDI) was used to quantify  
887 how well the choice could be discriminated ( $M = 8$ ). A saccade discrimination index (SDI) was  
888 used to quantify how well the saccade direction could be discriminated ( $M = 8$ ).

889 *Quantifying the dependency of orientation tuning on distance.* The tolerance of the 3D  
890 orientation tuning curves to distance was quantified as previously described (Chang et al., 2020b).

891 Briefly, we fit the 3D pose (orientation x distance) tuning curve with a multiplicatively separable  
892 model:

$$893 \quad R(\theta, D) = DC + g * H(\theta) * F(D) . \quad (\text{equation 3})$$

894  
895 Here,  $R$  is the response to orientation  $\theta$  (tilt and slant) and distance  $D$ ,  $DC$  is an offset,  $g$   
896 sets the response amplitude,  $H(\theta)$  is the orientation tuning curve, and  $F(D)$  is the distance tuning  
897 curve. A Tolerance index quantifying the dependence of the 3D orientation tuning curve shape on  
898 distance was calculated as the average correlation between the observed tuning curve and fit at  
899 each distance. We additionally tested an additively separable model  $R(\theta, D) = DC + H(\theta) + F(D)$ ,  
900 but did not present the results because the multiplicative model better described the responses  
901 of 690/692 V3A and 437/437 CIP neurons.

902 We also quantified the extent to which orientation preferences differed across distance.  
903 For each neuron, the preferred orientation was estimated at each distance with significant  
904 orientation selectivity (ANOVA,  $p < 0.05$ ; Bonferroni-Holm corrected for 4 distances) by fitting a  
905 Bingham function (Rosenberg et al., 2013). The principal orientation, the axis about which the  
906 preferences clustered, was determined by arranging the surface normal vectors corresponding to  
907 the preferences into a matrix and calculating the eigenvectors. The principal orientation was  
908 defined by the eigenvector with the largest eigenvalue (Chang et al., 2020b).

909 *Choice-related activity.* Choice-related activity was calculated using frontoparallel plane  
910 trials only. To remove response differences associated with the plane's distance, the responses  
911 were z-scored separately for each distance. Responses were then grouped according to the tilt  
912 choice. Choice tuning was assessed from the onset of choice-related activity for the area to the  
913 end of the stimulus presentation. A neuron was classified as having choice-related activity if the  
914 responses significantly depended on the choice (ANOVA,  $p < 0.05$ ).

915 *Presaccadic activity.* Saccade onset was defined as the first time point that the velocity of  
916 either eye was  $\geq 150^\circ/\text{s}$ . Saccade direction tuning was assessed from the start of presaccadic  
917 activity for the area to the saccade onset. A neuron was classified as having presaccadic activity  
918 if the baseline subtracted firing rates significantly depended on the saccade direction (ANOVA,  $p$   
919  $< 0.05$ ). The time point at which the time courses of presaccadic activity conditioned on saccade  
920 latency approximately coalesced was defined as when the sum squared error between the time  
921 courses and their mean was smallest. To visually compare the temporally integrated V3A and  
922 CIP time courses, we applied a DC offset and multiplicative gain to each integrated V3A time  
923 course to minimize the sum squared error with the CIP time course.

924 *Noise and signal correlations.* We calculated noise and signal correlations between pairs  
925 of simultaneously recorded neurons on the same tetrode in V3A ( $N = 404$  pairs) and CIP ( $N = 244$

926 pairs). To calculate noise correlations, we took the spike counts across trials for each 3D pose  
 927 condition ( $N = 132$ ) and removed outliers ( $> 3$  standard deviations from the mean response)  
 928 (Zohary et al., 1994; Kohn and Smith, 2005; Huang and Lisberger, 2009; Gu et al., 2011). To  
 929 remove stimulus-dependent response differences, the remaining spike counts were z-scored  
 930 separately for each condition. The correlation between the two neurons' responses was then  
 931 computed across conditions and trials. Signal correlations were computed between the 3D pose  
 932 tuning curves.

933 *Vergence control.* To determine if the 3D pose responses were significantly affected by  
 934 small vergence eye movements that did not violate the vergence window, we performed an  
 935 ANCOVA to test for main effects of stimulus tuning with vergence included as a covariate. Tilt  
 936 (linearized into cosine and sine components), slant, and distance were independent factors and  
 937 the mean vergence was a covariate. Only 67 (9.7%) V3A neurons showed a significant effect of  
 938 vergence ( $p < 0.05$ ). Importantly, the significance of the main effects did not depend on whether  
 939 vergence was included as a covariate for all but 13 (1.9%) V3A neurons. These results are  
 940 comparable to those in the CIP data (Chang et al., 2020b) and other studies (DeAngelis and Uka,  
 941 2003; Elmore et al., 2019), and suggest that vergence errors had a minimal impact on the findings.

942

## 943 **Appendix**

944 Here we show that the discrimination index is invariant to linear transformations of the neuronal  
 945 responses, using the example of z-scoring. The discrimination index is defined as:

946

$$947 \quad DI = \frac{R_{max} - R_{min}}{R_{max} - R_{min} + 2\sqrt{\frac{SSE}{(N-M)}}}$$

948

949 Here,  $R_{max}$  and  $R_{min}$  are the maximum and minimum mean responses across the tuning  
 950 curve, SSE is the sum squared error around the mean responses for each condition,  $N$  is the total  
 951 number of trials, and  $M$  is the number of conditions.

952 The z-score transformation is defined as:

953

$$954 \quad Z(x) = \frac{x - \mu}{\sigma}$$

955

956 Here,  $x$  is the observed value,  $\mu$  is the sample mean, and  $\sigma$  is the sample standard  
 957 deviation. We define  $DI_Z$  as the discrimination index of the z-scored responses:

958

$$959 \quad DI_Z = \frac{\frac{R_{max} - \mu}{\sigma} - \frac{R_{min} - \mu}{\sigma}}{\frac{R_{max} - \mu}{\sigma} - \frac{R_{min} - \mu}{\sigma} + Z\left(2\sqrt{\frac{SSE}{N-M}}\right)} = \frac{R_{max} - R_{min}}{R_{max} - R_{min} + \sigma * Z\left(2\sqrt{\frac{SSE}{N-M}}\right)}$$

960

961 Thus, if  $Z\left(2\sqrt{\frac{SSE}{N-M}}\right) = \frac{1}{\sigma} * 2\sqrt{\frac{SSE}{N-M}}$ , then  $DI = DI_Z$ . The SSE is given by:

962 
$$SSE = \sum_{i=1}^M \sum_{j=1}^{n_i} (R_{ij} - \mu_i)^2,$$

963  
 964 where  $M$  is the total number of conditions,  $n_i$  is the number of trials for the  $i^{th}$  condition,  $R_{ij}$  is the  
 965 response for the  $i^{th}$  condition and  $j^{th}$  trial, and  $\mu_i$  is the mean response for the  $i^{th}$  condition. Since  
 966  $\sum_{i=1}^M n_i = N$ ,

967 
$$Z \left( 2 \sqrt{\frac{SSE}{N-M}} \right) = Z \left( 2 \sqrt{\frac{\sum_{i=1}^M \sum_{j=1}^{n_i} (R_{ij} - \mu_i)^2}{N-M}} \right) = 2 \sqrt{\frac{\sum_{i=1}^M \sum_{j=1}^{n_i} \left( \frac{R_{ij} - \mu_i}{\sigma} - \frac{\mu_i - \mu}{\sigma} \right)^2}{N-M}}$$

968 
$$= 2 \sqrt{\frac{\sum_{i=1}^M \sum_{j=1}^{n_i} \frac{1}{\sigma^2} (R_{ij} - \mu_i)^2}{N-M}} = \frac{1}{\sigma} * 2 \sqrt{\frac{\sum_{i=1}^M \sum_{j=1}^{n_i} (R_{ij} - \mu_i)^2}{N-M}}.$$

969  
 970 Thus,  $Z \left( 2 \sqrt{\frac{SSE}{N-M}} \right)$  reduces to  $\frac{1}{\sigma} * 2 \sqrt{\frac{SSE}{N-M}}$ , and  $DI = DI_Z$ .

971

## 972 Acknowledgments

973 We thank Zikang Zhu for helpful discussion, as well as Meghan Lowe and Satchal Postlewaite for  
 974 help with spike sorting. R.D. was supported by the National Institutes of Health (T32EY027721)  
 975 and National Science Foundation (DGE-1545481). T-Y.C. was supported by a Dissertation  
 976 Completion Fellowship from UW–Madison. L.W.T. was supported by the National Institutes of  
 977 Health (T32NS105602), National Science Foundation (DGE-1545481), and McPherson Eye  
 978 Research Institute Graduate Student Support Initiative. The research was supported by the Alfred  
 979 P. Sloan Foundation (FG-2016-6468), Whitehall Foundation (2016-08-18), Greater Milwaukee  
 980 Foundation (Shaw Scientist Award), and the National Institutes of Health (EY029438). Further  
 981 support was provided by National Institutes of Health Grant P51OD011106 to the Wisconsin  
 982 National Primate Research Center and by National Institute of Child Health and Human  
 983 Development Grant P50HD105353 to the Waisman Center.

984

## 985 Competing Interests

986 The authors declare that no competing interests exist.

987

## 988 References

- 989 Alizadeh AM, Van Dromme I, Verhoef BE, Janssen P (2018) Caudal intraparietal sulcus and  
 990 three-dimensional vision: A combined functional magnetic resonance imaging and single-cell  
 991 study. *Neuroimage* 166:46-59.
- 992 Anzai A, Chowdhury SA, DeAngelis GC (2011) Coding of stereoscopic depth information in visual  
 993 areas V3 and V3A. *J Neurosci* 31:10270-10282.
- 994 Baizer JS, Ungerleider LG, Desimone R (1991) Organization of visual inputs to the inferior  
 995 temporal and posterior parietal cortex in macaques. *J Neurosci* 11:168-190.
- 996 Ban H, Welchman AE (2015) fMRI analysis-by-synthesis reveals a dorsal hierarchy that extracts  
 997 surface slant. *J Neurosci* 35:9823-9835.
- 998 Banks MS, Hooge IT, Backus BT (2001) Perceiving slant about a horizontal axis from stereopsis.  
 999 *J Vis* 1:55-79.
- 1000 Bingham C (1974) An antipodally symmetric distribution on the sphere. *The Annals of*  
 1001 *Statistics*:1201-1225.
- 1002 Britten KH, Newsome WT, Shadlen MN, Celebrini S, Movshon JA (1996) A relationship between  
 1003 behavioral choice and the visual responses of neurons in macaque MT. *Vis Neurosci* 13:87-

- 1004 100.
- 1005 Buneo CA, Andersen RA (2006) The posterior parietal cortex: Sensorimotor interface for the
- 1006 planning and online control of visually guided movements. *Neuropsychologia* 44:2594-2606.
- 1007 Celebrini S, Newsome WT (1994) Neuronal and psychophysical sensitivity to motion signals in
- 1008 extrastriate area MST of the macaque monkey. *J Neurosci* 14:4109-4124.
- 1009 Chang TY, Thompson L, Doudlah R, Kim B, Sunkara A, Rosenberg A (2020a) Optimized but Not
- 1010 Maximized Cue Integration for 3D Visual Perception. *eNeuro* 7.
- 1011 Chang TY, Doudlah R, Kim B, Sunkara A, Thompson LW, Lowe ME, Rosenberg A (2020b)
- 1012 Functional links between sensory representations, choice activity, and sensorimotor
- 1013 associations in parietal cortex. *Elife* 9.
- 1014 Cohen MR, Newsome WT (2008) Context-dependent changes in functional circuitry in visual area
- 1015 MT. *Neuron* 60:162-173.
- 1016 Cohen MR, Maunsell JH (2009) Attention improves performance primarily by reducing
- 1017 interneuronal correlations. *Nat Neurosci* 12:1594-1600.
- 1018 Cumming BG, Nienborg H (2016) Feedforward and feedback sources of choice probability in
- 1019 neural population responses. *Curr Opin Neurobiol* 37:126-132.
- 1020 Dakin CJ, Rosenberg A (2018) Gravity estimation and verticality perception. *Handb Clin Neurol*
- 1021 159:43-59.
- 1022 DeAngelis GC, Uka T (2003) Coding of horizontal disparity and velocity by MT neurons in the
- 1023 alert macaque. *J Neurophysiol* 89:1094-1111.
- 1024 Dodd JV, Krug K, Cumming BG, Parker AJ (2001) Perceptually bistable three-dimensional figures
- 1025 evoke high choice probabilities in cortical area MT. *J Neurosci* 21:4809-4821.
- 1026 Elmore LC, Rosenberg A, DeAngelis GC, Angelaki DE (2019) Choice-related activity during visual
- 1027 slant discrimination in macaque CIP but not V3A. *eNeuro* 6.
- 1028 Felleman DJ, Van Essen DC (1991) Distributed hierarchical processing in the primate cerebral
- 1029 cortex. *Cereb Cortex* 1:1-47.
- 1030 Fisher N (1995) *Statistical Analysis Of Circular Data*. In. Cambridge: Cambridge University Press.
- 1031 Galletti C, Battaglini PP (1989) Gaze-dependent visual neurons in area V3A of monkey prestriate
- 1032 cortex. *J Neurosci* 9:1112-1125.
- 1033 Galletti C, Battaglini PP, Fattori P (1990) 'Real-motion' cells in area V3A of macaque visual cortex.
- 1034 *Exp Brain Res* 82:67-76.
- 1035 Gaska JP, Jacobson LD, Pollen DA (1987) Response suppression by extending sine-wave
- 1036 gratings within the receptive fields of neurons in visual cortical area V3A of the macaque
- 1037 monkey. *Vision Res* 27:1687-1692.
- 1038 Gaska JP, Jacobson LD, Pollen DA (1988) Spatial and temporal frequency selectivity of neurons
- 1039 in visual cortical area V3A of the macaque monkey. *Vision Res* 28:1179-1191.
- 1040 Gu Y, Angelaki DE, DeAngelis GC (2014) Contribution of correlated noise and selective decoding
- 1041 to choice probability measurements in extrastriate visual cortex. *Elife* 3.
- 1042 Gu Y, Liu S, Fetsch CR, Yang Y, Fok S, Sunkara A, DeAngelis GC, Angelaki DE (2011)
- 1043 Perceptual learning reduces interneuronal correlations in macaque visual cortex. *Neuron*
- 1044 71:750-761.
- 1045 Haefner RM, Gerwinn S, Macke JH, Bethge M (2013) Inferring decoding strategies from choice
- 1046 probabilities in the presence of correlated variability. *Nat Neurosci* 16:235-242.
- 1047 Hanes DP, Schall JD (1996) Neural control of voluntary movement initiation. *Science* 274:427-
- 1048 430.
- 1049 Hegde J, Van Essen DC (2005) Role of primate visual area V4 in the processing of 3-D shape
- 1050 characteristics defined by disparity. *J Neurophysiol* 94:2856-2866.
- 1051 Henderson M, Vo V, Chunharas C, Sprague T, Serences J (2019) Multivariate analysis of BOLD
- 1052 activation patterns recovers graded depth representations in human visual and parietal cortex.
- 1053 *eNeuro* 6.
- 1054 Hillis JM, Watt SJ, Landy MS, Banks MS (2004) Slant from texture and disparity cues: Optimal



- 1055 cue combination. *J Vis* 4:967-992.
- 1056 Hsi S, Linn MC, Bell JE (1997) The role of spatial reasoning in engineering and the design of  
1057 spatial instruction. *Journal of engineering education* 86:151-158.
- 1058 Huang X, Lisberger SG (2009) Noise correlations in cortical area MT and their potential impact  
1059 on trial-by-trial variation in the direction and speed of smooth-pursuit eye movements. *J*  
1060 *Neurophysiol* 101:3012-3030.
- 1061 Janssen P, Vogels R, Orban GA (2000) Three-dimensional shape coding in inferior temporal  
1062 cortex. *Neuron* 27:385-397.
- 1063 Judd CM, Yzerbyt VY, Muller D (2014) Mediation and moderation. *Handbook of research methods*  
1064 *in social and personality psychology* 2:653-676.
- 1065 Katsuyama N, Yamashita A, Sawada K, Naganuma T, Sakata H, Taira M (2010) Functional and  
1066 histological properties of caudal intraparietal area of macaque monkey. *Neuroscience* 167:1-  
1067 10.
- 1068 Kim B, Kenchappa SC, Sunkara A, Chang TY, Thompson L, Doudlah R, Rosenberg A (2019)  
1069 Real-time experimental control using network-based parallel processing. *Elife* 8.
- 1070 Kohn A, Smith MA (2005) Stimulus dependence of neuronal correlation in primary visual cortex  
1071 of the macaque. *J Neurosci* 25:3661-3673.
- 1072 Lanzilotto M, Ferroni CG, Livi A, Gerbella M, Maranesi M, Borra E, Passarelli L, Gamberini M,  
1073 Fogassi L, Bonini L, Orban GA (2019) Anterior intraparietal area: A hub in the observed  
1074 manipulative action network. *Cereb Cortex* 29:1816-1833.
- 1075 Lewis JW, Van Essen DC (2000) Corticocortical connections of visual, sensorimotor, and  
1076 multimodal processing areas in the parietal lobe of the macaque monkey. *J Comp Neurol*  
1077 428:112-137.
- 1078 Liu S, Gu Y, DeAngelis GC, Angelaki DE (2013) Choice-related activity and correlated noise in  
1079 subcortical vestibular neurons. *Nat Neurosci* 16:89-97.
- 1080 Munoz DP, Wurtz RH (1995) Saccade-related activity in monkey superior colliculus. I.  
1081 Characteristics of burst and buildup cells. *J Neurophysiol* 73:2313-2333.
- 1082 Nakamura H, Kuroda T, Wakita M, Kusunoki M, Kato A, Mikami A, Sakata H, Itoh K (2001) From  
1083 three-dimensional space vision to prehensile hand movements: The lateral intraparietal area  
1084 links the area V3A and the anterior intraparietal area in macaques. *J Neurosci* 21:8174-8187.
- 1085 Nakamura K, Colby CL (2000) Visual, saccade-related, and cognitive activation of single neurons  
1086 in monkey extrastriate area V3A. *J Neurophysiol* 84:677-692.
- 1087 Nakamura K, Colby CL (2002) Updating of the visual representation in monkey striate and  
1088 extrastriate cortex during saccades. *Proc Natl Acad Sci U S A* 99:4026-4031.
- 1089 Nakhla N, Korkian Y, Krause MR, Pack CC (2021) Neural Selectivity for Visual Motion in Macaque  
1090 Area V3A. *eNeuro* 8.
- 1091 Nguyenkim JD, DeAngelis GC (2003) Disparity-based coding of three-dimensional surface  
1092 orientation by macaque middle temporal neurons. *J Neurosci* 23:7117-7128.
- 1093 Nienborg H, Cumming BG (2006) Macaque V2 neurons, but not V1 neurons, show choice-related  
1094 activity. *J Neurosci* 26:9567-9578.
- 1095 Niu M, Impieri D, Rapan L, Funck T, Palomero-Gallagher N, Zilles K (2020) Receptor-driven,  
1096 multimodal mapping of cortical areas in the macaque monkey intraparietal sulcus. *Elife* 9.
- 1097 Pause M, Freund HJ (1989) Role of the parietal cortex for sensorimotor transformation. Evidence  
1098 from clinical observations. *Brain Behav Evol* 33:136-140.
- 1099 Premereur E, Van Dromme IC, Romero MC, Vanduffel W, Janssen P (2015) Effective connectivity  
1100 of depth-structure-selective patches in the lateral bank of the macaque intraparietal sulcus.  
1101 *PLoS Biol* 13:e1002072.
- 1102 Prince SJ, Pointon AD, Cumming BG, Parker AJ (2002) Quantitative analysis of the responses of  
1103 V1 neurons to horizontal disparity in dynamic random-dot stereograms. *J Neurophysiol* 87:191-  
1104 208.
- 1105 Reynolds JH, Heeger DJ (2009) The normalization model of attention. *Neuron* 61:168-185.

- 1106 Roitman JD, Shadlen MN (2002) Response of neurons in the lateral intraparietal area during a  
1107 combined visual discrimination reaction time task. *J Neurosci* 22:9475-9489.
- 1108 Rosenberg A, Angelaki DE (2014a) Reliability-dependent contributions of visual orientation cues  
1109 in parietal cortex. *Proc Natl Acad Sci U S A* 111:18043-18048.
- 1110 Rosenberg A, Angelaki DE (2014b) Gravity influences the visual representation of object tilt in  
1111 parietal cortex. *J Neurosci* 34:14170-14180.
- 1112 Rosenberg A, Cowan NJ, Angelaki DE (2013) The visual representation of 3D object orientation  
1113 in parietal cortex. *J Neurosci* 33:19352-19361.
- 1114 Ruff DA, Cohen MR (2014) Global cognitive factors modulate correlated response variability  
1115 between V4 neurons. *J Neurosci* 34:16408-16416.
- 1116 Rushworth MF, Nixon PD, Passingham RE (1997) Parietal cortex and movement. I. Movement  
1117 selection and reaching. *Exp Brain Res* 117:292-310.
- 1118 Sauvan XM, Peterhans E (1999) Orientation constancy in neurons of monkey visual cortex. *Visual*  
1119 *Cognition* 6:43-54.
- 1120 Seilheimer RL, Rosenberg A, Angelaki DE (2014) Models and processes of multisensory cue  
1121 combination. *Curr Opin Neurobiol* 25:38-46.
- 1122 Shadlen MN, Newsome WT (1996) Motion perception: seeing and deciding. *Proc Natl Acad Sci*  
1123 *U S A* 93:628-633.
- 1124 Shadlen MN, Britten KH, Newsome WT, Movshon JA (1996) A computational analysis of the  
1125 relationship between neuronal and behavioral responses to visual motion. *J Neurosci* 16:1486-  
1126 1510.
- 1127 Smolyanskaya A, Haefner RM, Lomber SG, Born RT (2015) A Modality-Specific Feedforward  
1128 Component of Choice-Related Activity in MT. *Neuron* 87:208-219.
- 1129 Stevens KA (1983) Slant-tilt: The visual encoding of surface orientation. *Biol Cybern* 46:183-195.
- 1130 Taira M, Tsutsui KI, Jiang M, Yara K, Sakata H (2000) Parietal neurons represent surface  
1131 orientation from the gradient of binocular disparity. *J Neurophysiol* 83:3140-3146.
- 1132 Tsao DY, Vanduffel W, Sasaki Y, Fize D, Knutsen TA, Mandeville JB, Wald LL, Dale AM, Rosen  
1133 BR, Van Essen DC, Livingstone MS, Orban GA, Tootell RB (2003) Stereopsis activates V3A  
1134 and caudal intraparietal areas in macaques and humans. *Neuron* 39:555-568.
- 1135 Tsutsui K, Sakata H, Naganuma T, Taira M (2002) Neural correlates for perception of 3D surface  
1136 orientation from texture gradient. *Science* 298:409-412.
- 1137 Tsutsui K, Jiang M, Sakata H, Taira M (2003) Short-term memory and perceptual decision for  
1138 three-dimensional visual features in the caudal intraparietal sulcus (area CIP). *J Neurosci*  
1139 23:5486-5495.
- 1140 Tsutsui K, Jiang M, Yara K, Sakata H, Taira M (2001) Integration of perspective and disparity  
1141 cues in surface-orientation-selective neurons of area CIP. *J Neurophysiol* 86:2856-2867.
- 1142 Van Dromme IC, Premereur E, Verhoef BE, Vanduffel W, Janssen P (2016) Posterior parietal  
1143 cortex drives inferotemporal activations during three-dimensional object vision. *PLoS Biol*  
1144 14:e1002445.
- 1145 Van Essen DC, Lewis JW, Drury HA, Hadjikhani N, Tootell RB, Bakircioglu M, Miller MI (2001)  
1146 Mapping visual cortex in monkeys and humans using surface-based atlases. *Vision Res*  
1147 41:1359-1378.
- 1148 Zeki S (1980) A direct projection from area V1 to area V3A of rhesus monkey visual cortex. *Proc*  
1149 *R Soc Lond B Biol Sci* 207:499-506.
- 1150 Ziamba CM, Simoncelli EP (2021) Opposing effects of selectivity and invariance in peripheral  
1151 vision. *Nat Commun* 12:4597.
- 1152 Zohary E, Shadlen MN, Newsome WT (1994) Correlated neuronal discharge rate and its  
1153 implications for psychophysical performance. *Nature* 370:140-143.
